# Supplementary material
Source: publisher figshare collection journal article supplement (https://acs.figshare.com/ndownloader/files/17277125)
Supplement: Supplementary file 1 [file 17277125]

# Triazolyl Ru<sup>II</sup>, Rh<sup>III</sup>, Os<sup>II</sup> and Ir<sup>III</sup> Complexes as Potential Anticancer Agents: Synthesis, Structure Elucidation, Cytotoxicity and DNA Model Interaction Studies

Charles K. Rono<sup>1</sup>, William K. Chu<sup>1</sup>, James Darkwa<sup>1</sup>, Debra Meyer<sup>2</sup> and Banothile C.E. Makhubela<sup>1\*</sup>

<sup>1</sup>Department of Chemistry, University of Johannesburg, Kingsway Campus, 2006, Auckland Park, SA

<sup>2</sup>Department of Biochemistry, University of Johannesburg, Kingsway Campus, 2006, Auckland Park, SA

Email: [bmakhubela@uj.ac.za](mailto:bmakhubela@uj.ac.za)

## NMR Spectra, Single Crystal X-Ray Structures and Mass Spectrometry Data

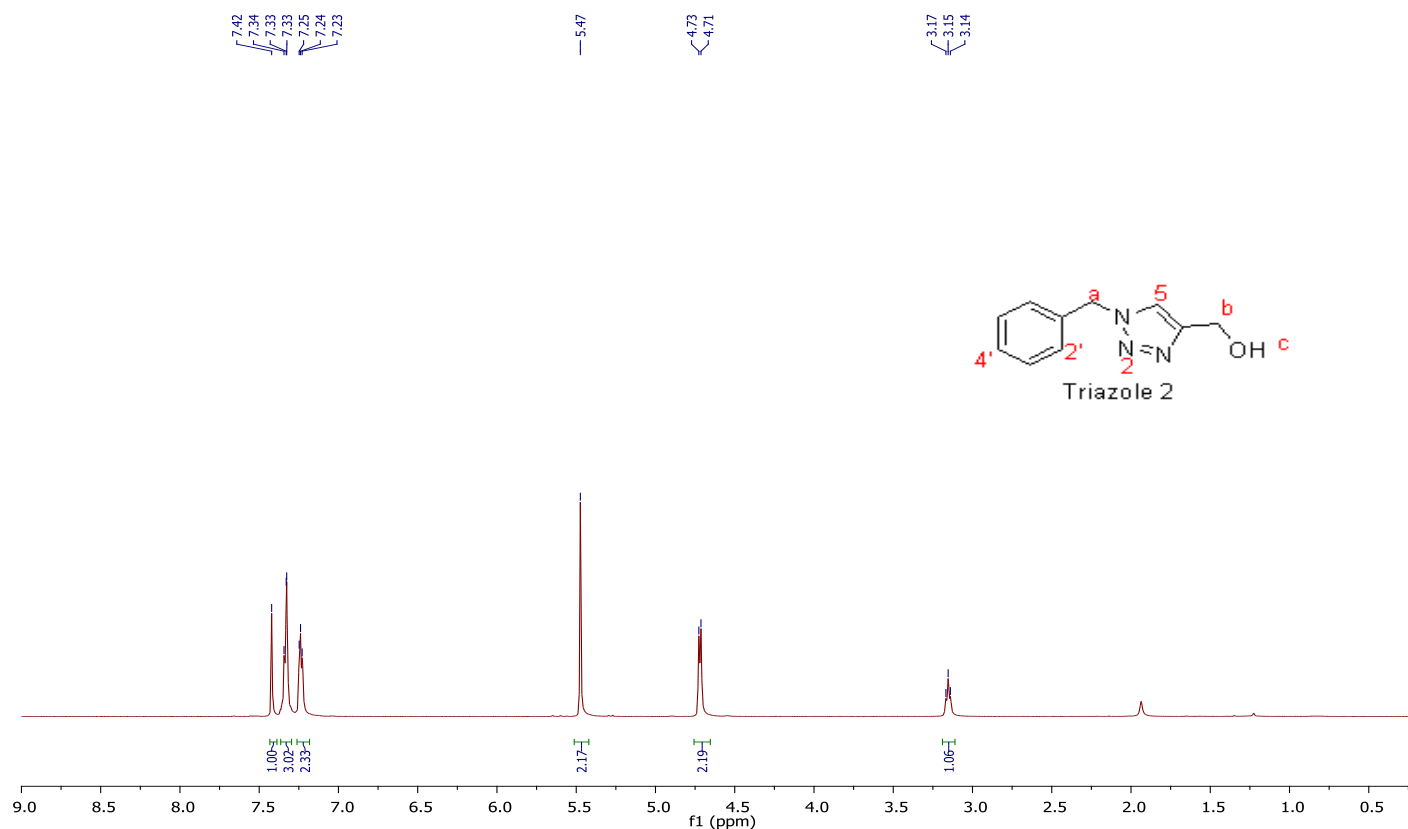

**Figure S1:** <sup>1</sup>H NMR spectrum of the oxidized triazole isomer **2**, 1-benzyl-4-hydroxymethyl-1*H*-1,2,3-triazole in CDCl<sub>3</sub> recorded using a 400 MHz FTNMR spectrometer.

## SUPPORTING INFORMATION

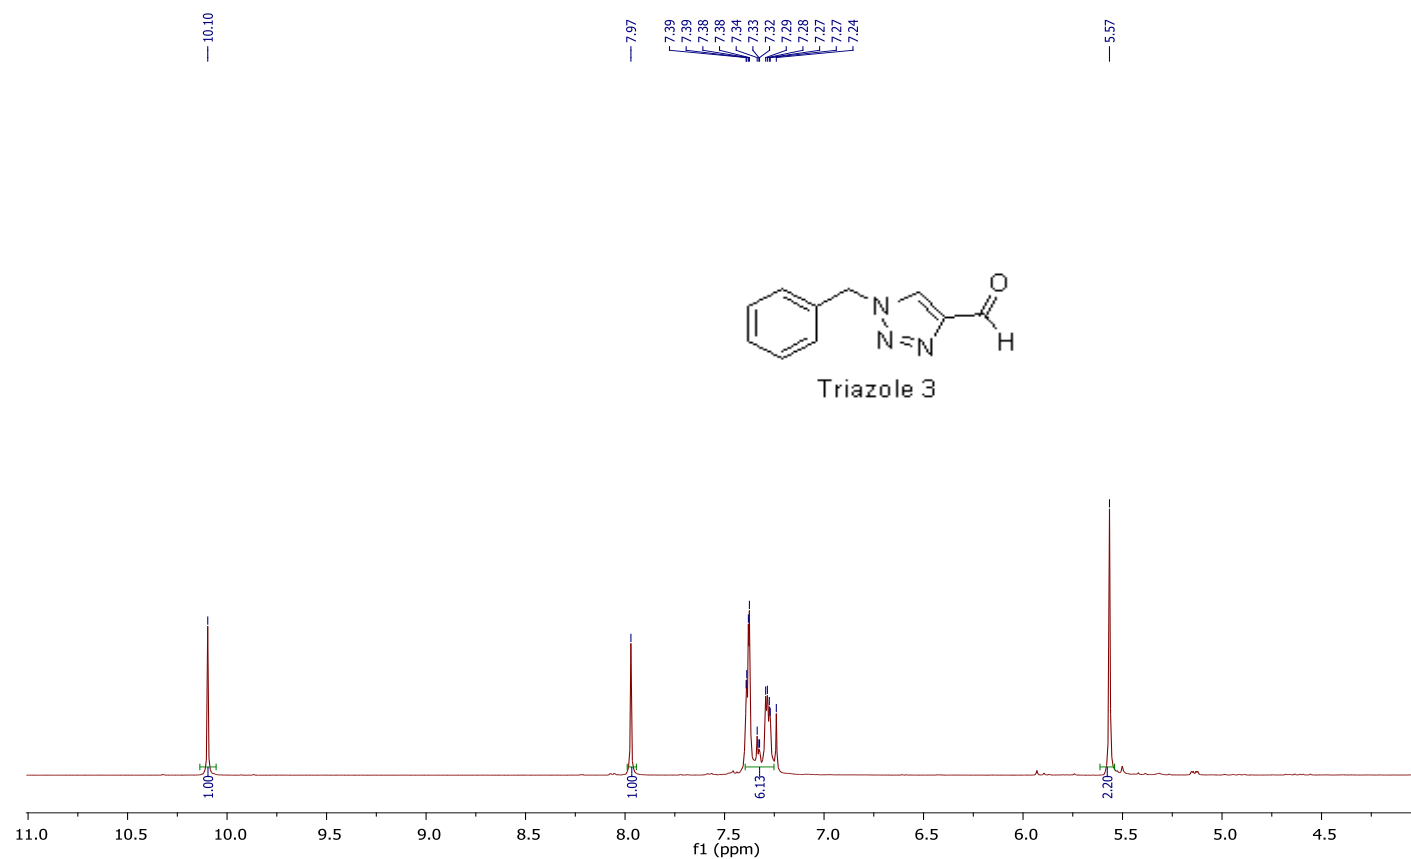

**Figure S2:** <sup>1</sup>H NMR spectrum of the oxidized triazole isomer **3**, 1-benzyl-4-carboxaldehyde-1*H*-1,2,3-triazole, in CDCl<sub>3</sub> recorded using a 400 MHz FTNMR spectrometer.

## SUPPORTING INFORMATION

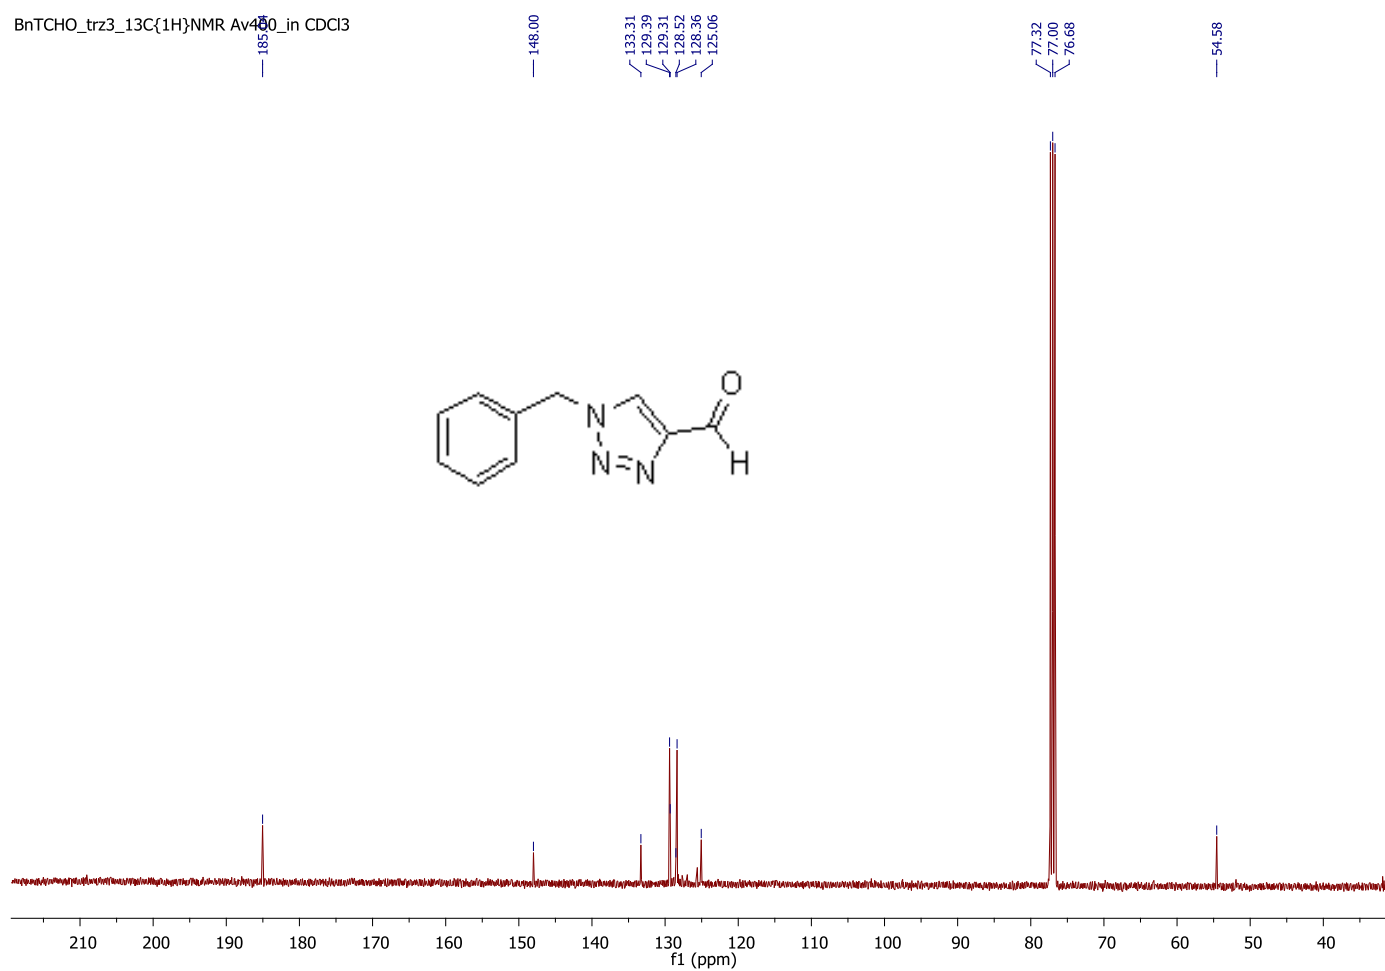

**Figure S3:**  $^{13}\text{C}\{^1\text{H}\}$  NMR spectrum of the oxidized triazole isomer **3**, 1-benzyl-4-carboxaldehyde-1H-1,2,3-triazole, in  $\text{CDCl}_3$  recorded using a 100 MHz FTNMR spectrometer

## SUPPORTING INFORMATION

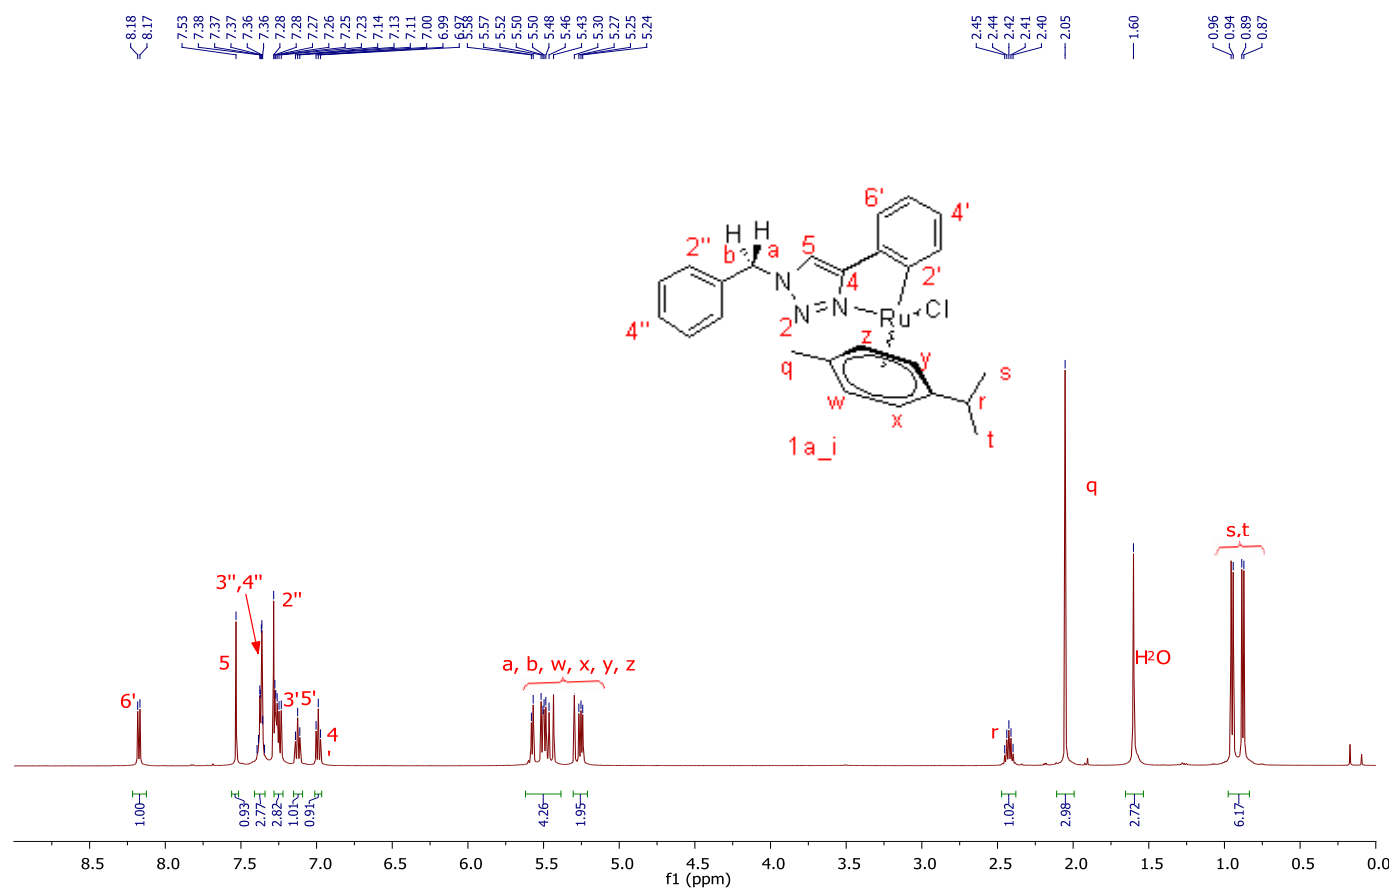

**Figure S4:** <sup>1</sup>H NMR spectrum of stereoisomer **1** of conjugated 1-benzyl-4-phenyl-1*H*-1,2,3-triazolyl(*p*-cymene)ruthenium(II) chloride 5-membered metallacycle, **1a\_i**, in CDCl<sub>3</sub> recorded using a 500 MHz FTNMR spectrometer.

## SUPPORTING INFORMATION

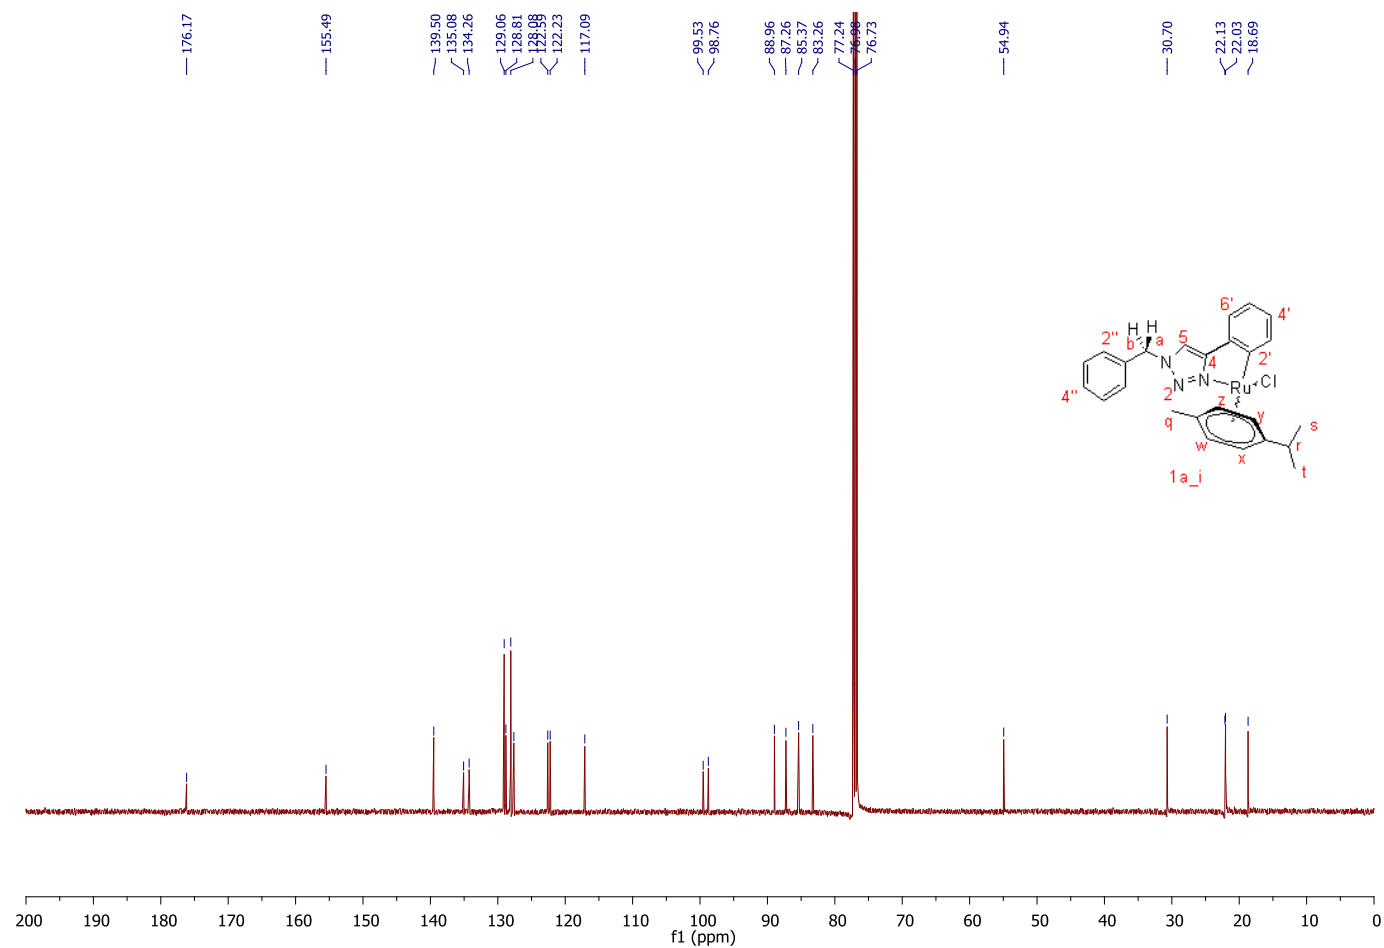

## SUPPORTING INFORMATION

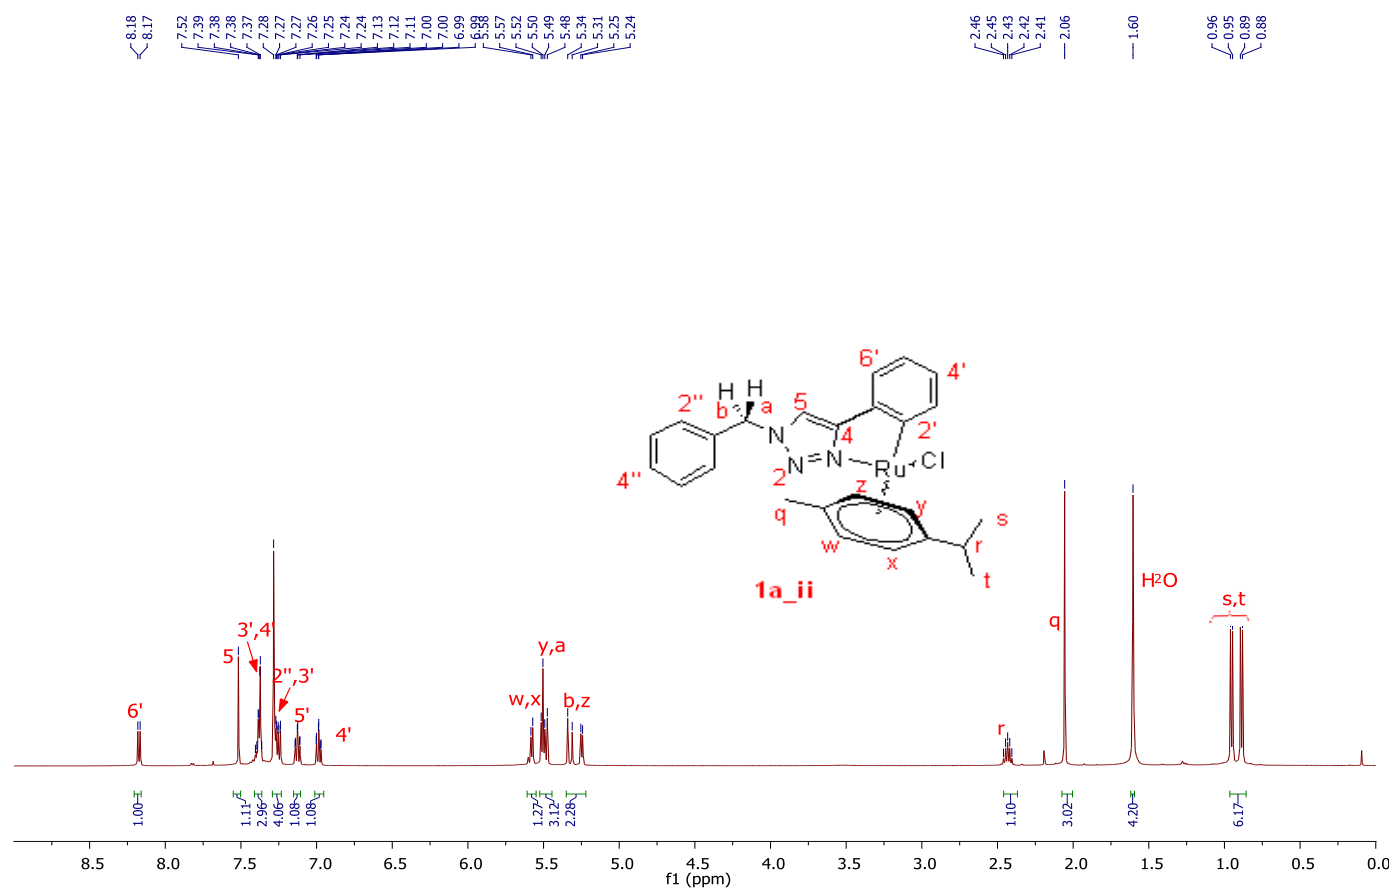

**Figure S6:** <sup>1</sup>H NMR spectrum of stereoisomer **II** of conjugated 1-benzyl-4-phenyl-1*H*-1,2,3-triazolyl(*p*-cymene)ruthenium(II) chloride 5-membered metallacycle, **1a\_II**, in CDCl<sub>3</sub> recorded using a 500 MHz FTNMR spectrometer.

## SUPPORTING INFORMATION

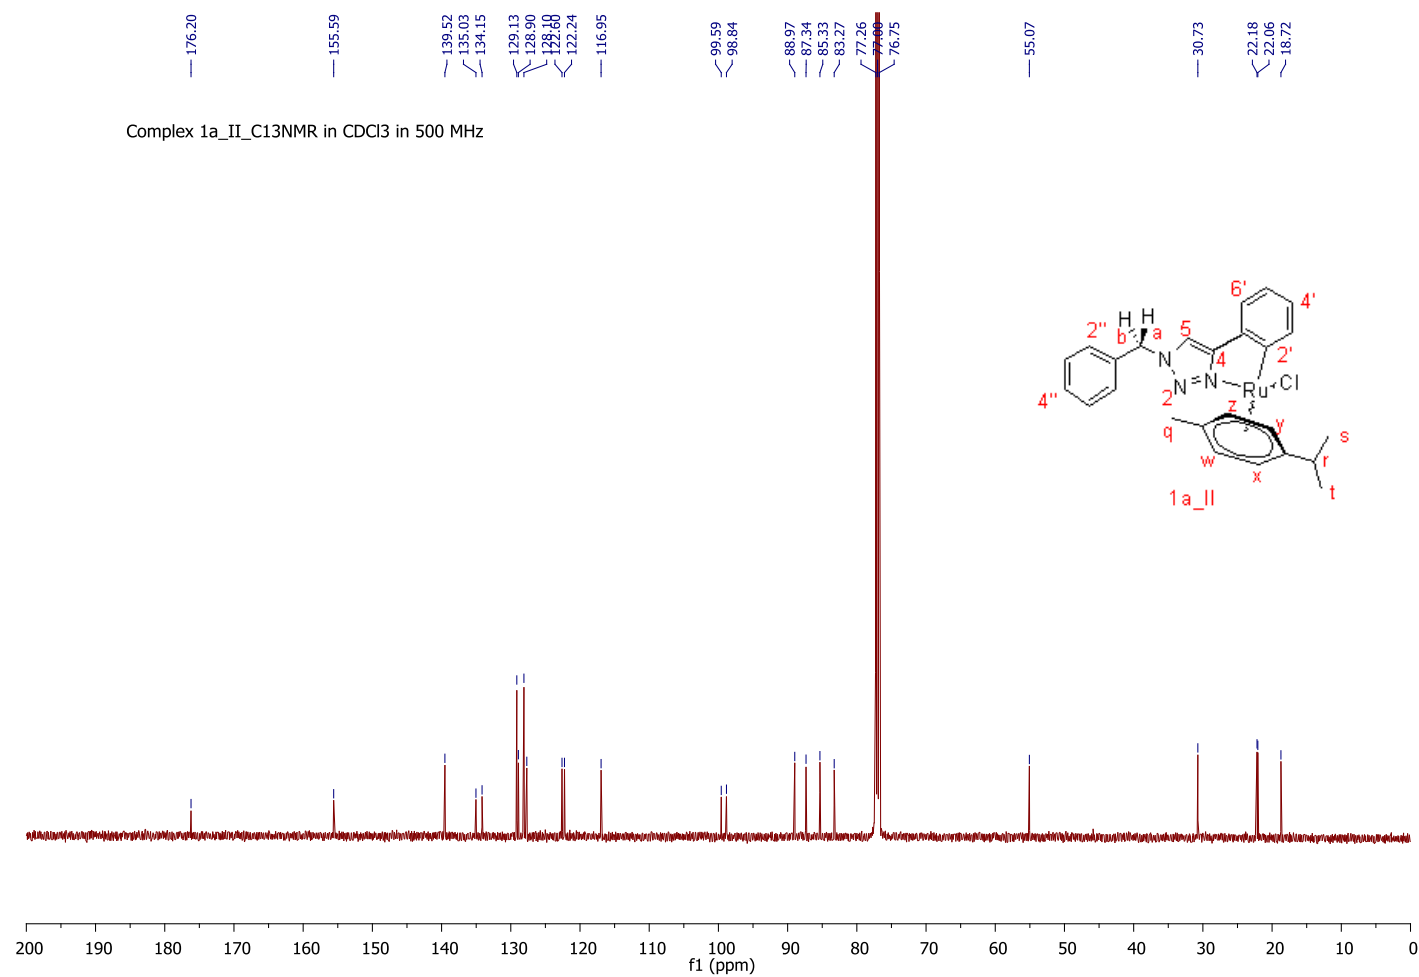

**Figure S7:**  $^{13}\text{C}\{^1\text{H}\}$  NMR spectrum of stereoisomer **II** of conjugated 1-benzyl-4-phenyl-1*H*-1,2,3-triazolyl(*p*-cymene)ruthenium(II) chloride 5-membered metallacycle, **1a\_II**, in CDCl<sub>3</sub> recorded using a 125 MHz FTNMR spectrometer.

## SUPPORTING INFORMATION

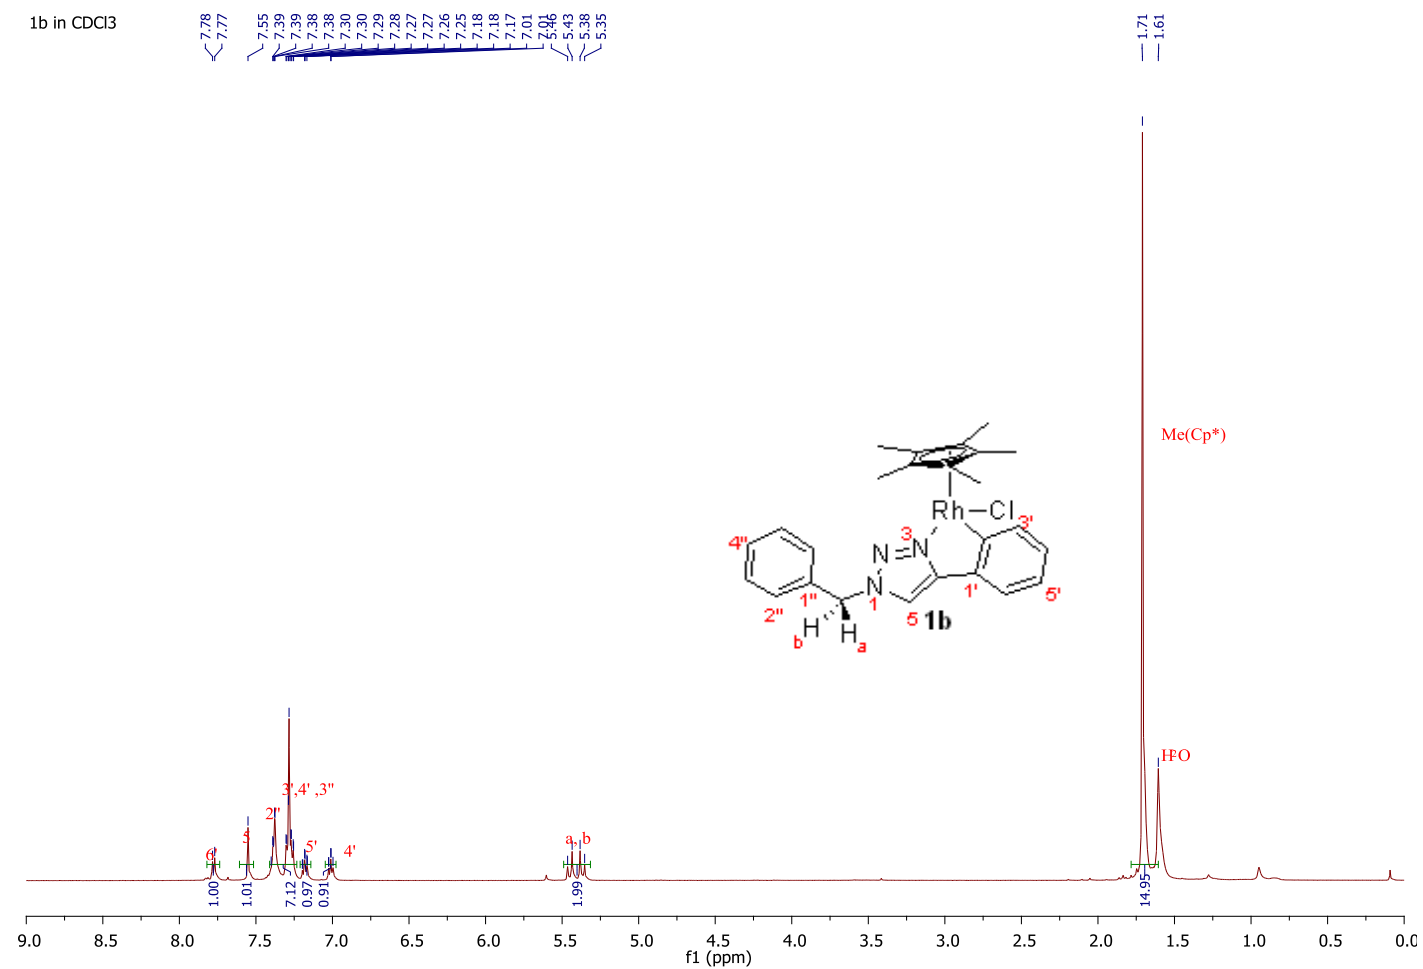

**Figure S8:** <sup>1</sup>H NMR spectrum of 1-benzyl-4-phenyl-1*H*-1,2,3-triazolyl-(pentamethylcyclopentadienyl)rhodium(III) chloride complex **1b** in CDCl<sub>3</sub> recorded using a 400 MHz FTNMR spectrometer.



## SUPPORTING INFORMATION

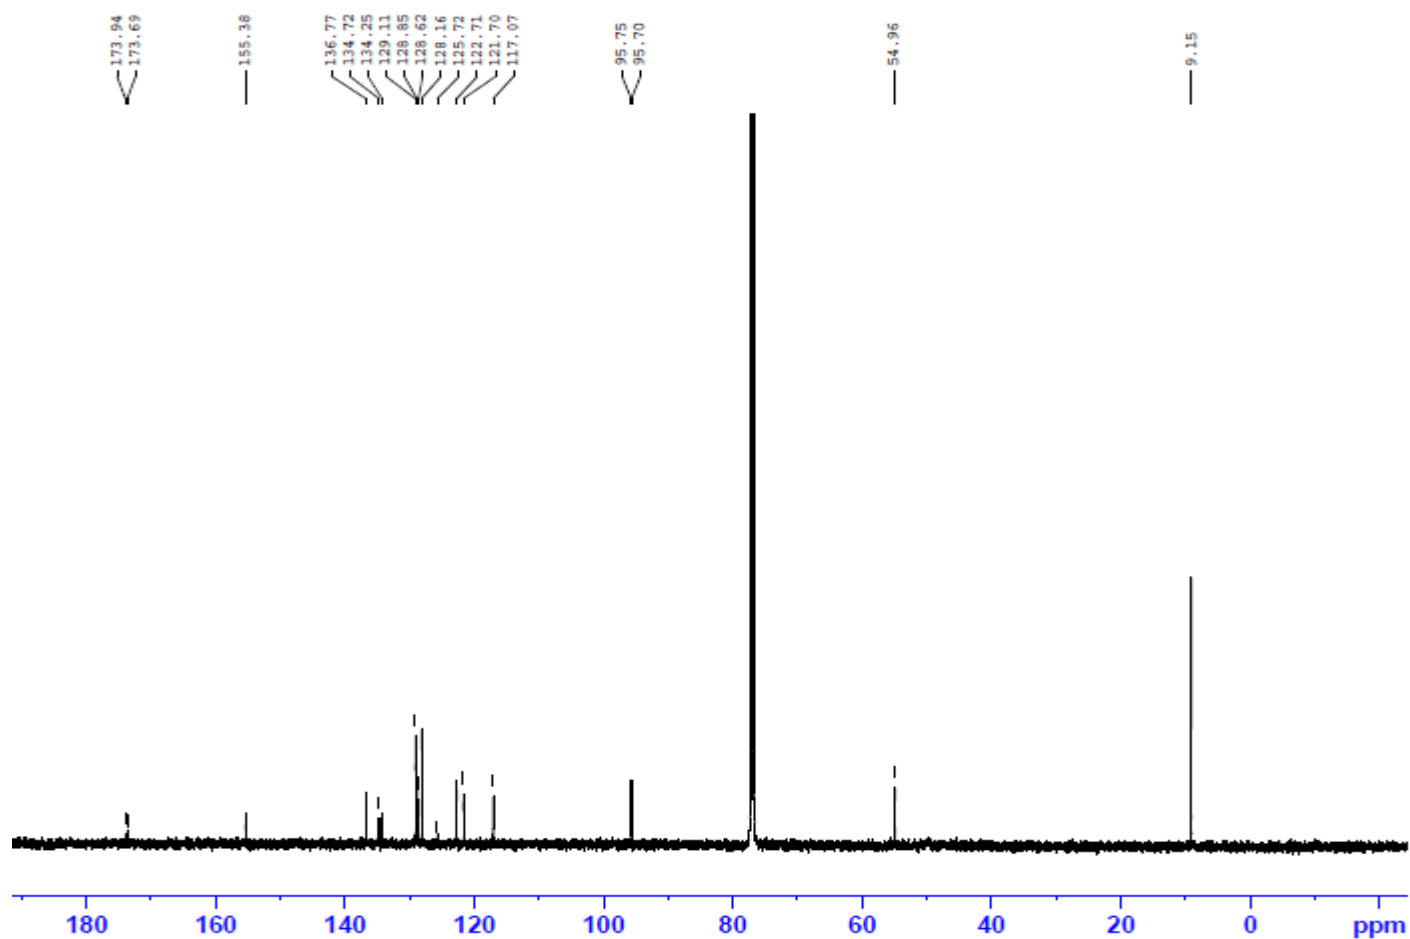

**Figure S9:**  $^{13}\text{C}\{^1\text{H}\}$  NMR spectrum of 1-benzyl-4-phenyl-1*H*-1,2,3-triazolyl-(pentamethylcyclopentadienyl)rhodium(III) chloride, complex **1b** in  $\text{CDCl}_3$  recorded using a 100 MHz FTNMR spectrometer.

## SUPPORTING INFORMATION

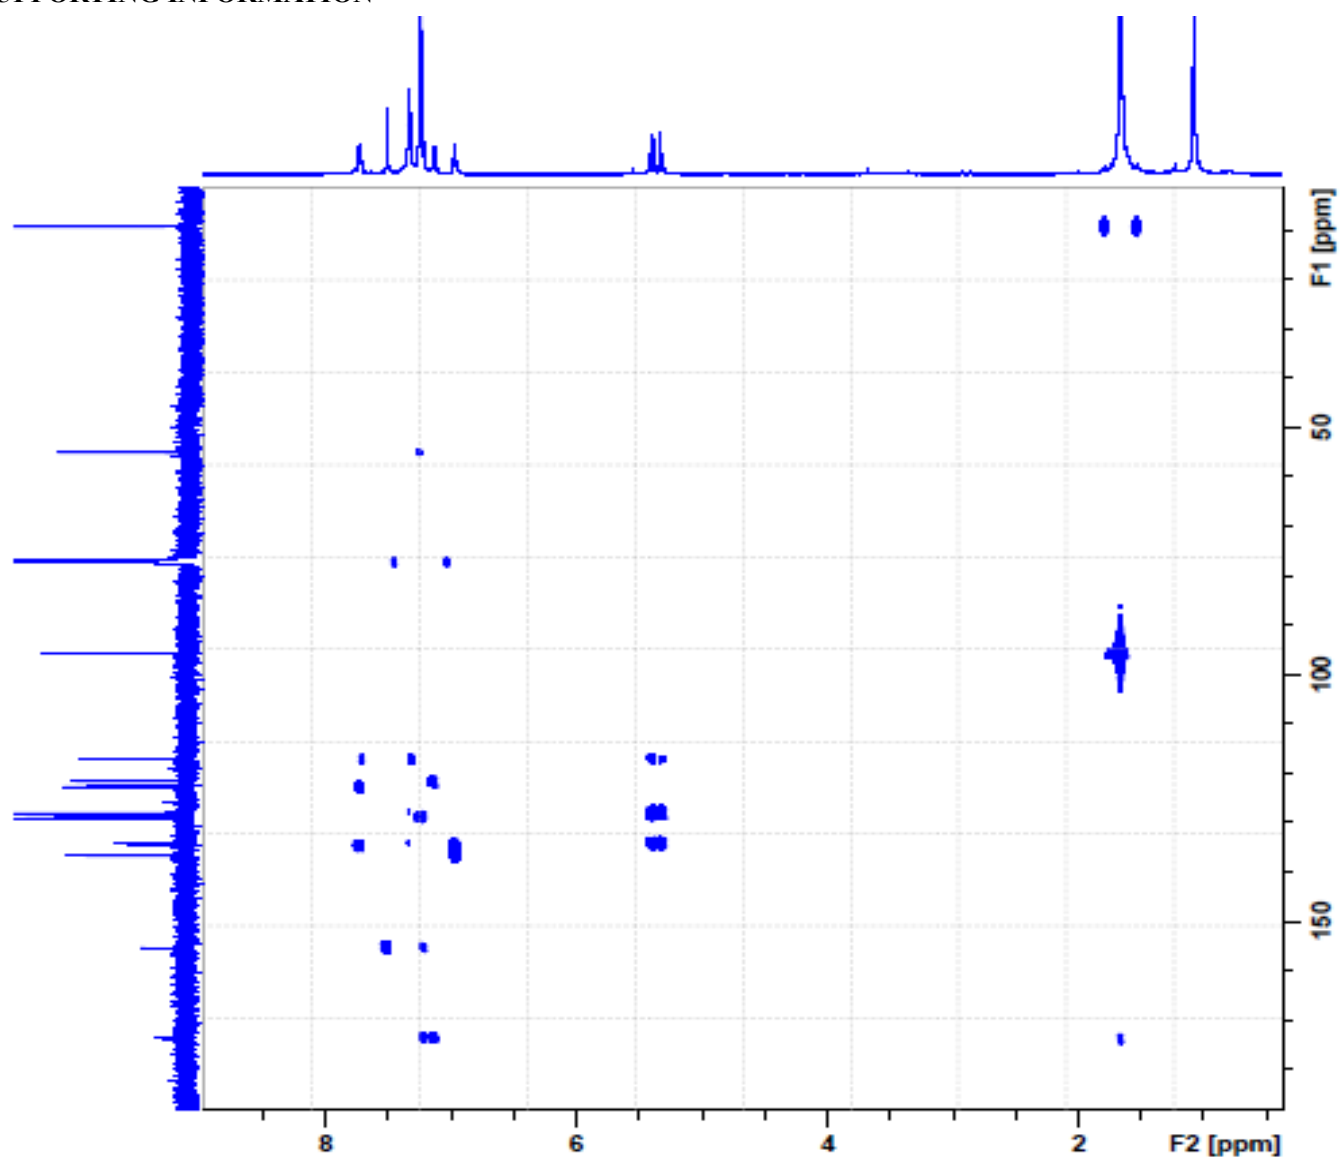

**Figure S10:**  $^1\text{H}$ - $^{13}\text{C}$  HMBC spectrum showing cross-peaks of protons (H) in through (two-to-four) bonds correlations with neighboring carbon atoms correlations in rhodium(III) cyclometalate **1b** in  $\text{CDCl}_3$  recorded using a 500 MHz FTNMR spectrometer.

## SUPPORTING INFORMATION

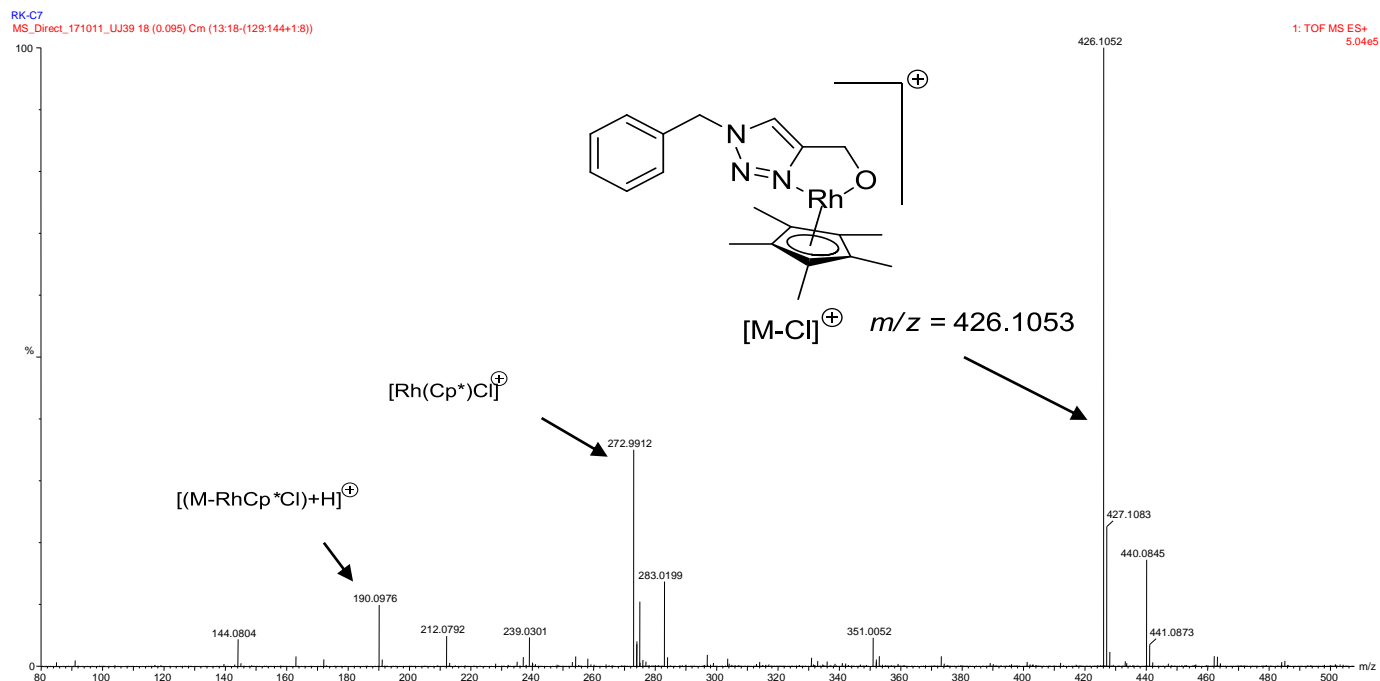

**Figure S11:** HRMS-ESI spectrum of conjugated 1-benzyl-4-methoxy-1*H*-1,2,3-triazolyl(1,2,3,4,5-pentamethylcyclopentadienyl)rhodium(III) chloride complex, **2b**.

**Table S1:** Selected NOESY  $^1H$ - $^1H$  correlations in complex **1b** and **1b-5'-GMP** and  $^1H$ - $^{13}C$  HMBC for **1b**

| Chemical Shift, $\delta$ (ppm) |                         |                  |                                         |
|--------------------------------|-------------------------|------------------|-----------------------------------------|
| H                              | NOESY ( $^1H$ - $^1H$ ) |                  | HMBC ( $^1H$ - $^{13}C$ )               |
|                                | <b>1b</b>               | <b>1b-5'-GMP</b> | <b>1b</b>                               |
| 5.3                            | 7.32, 7.52              | 7.32, 4.3(GMP)   | 117.0 (C-5), 128.6 (C-2"), 134.2 (C-1") |
| 6.96                           | 7.13                    | 7.13             | 134.7 (C-1'), 136.7 (C-6')              |
| 7.13                           | 6.96                    | 6.96             | 121.7 (C-3'), 173.7 (C-2'(Rh))          |
| 7.32                           | 5.3                     | H8 (Im), 5.3     | 128.1 (C-3"), 134.2(C-1")               |
| 7.51                           | 5.3                     |                  | 117.0 (C-H, dd, $1J_{CH} = Hz$ ), 54.9  |
| 7.73                           | 1.66 Me (Cp*)           | 1.66 Me(Cp*)     | 122.7 (C-3'), 134.7 (C-1')              |

## SUPPORTING INFORMATION

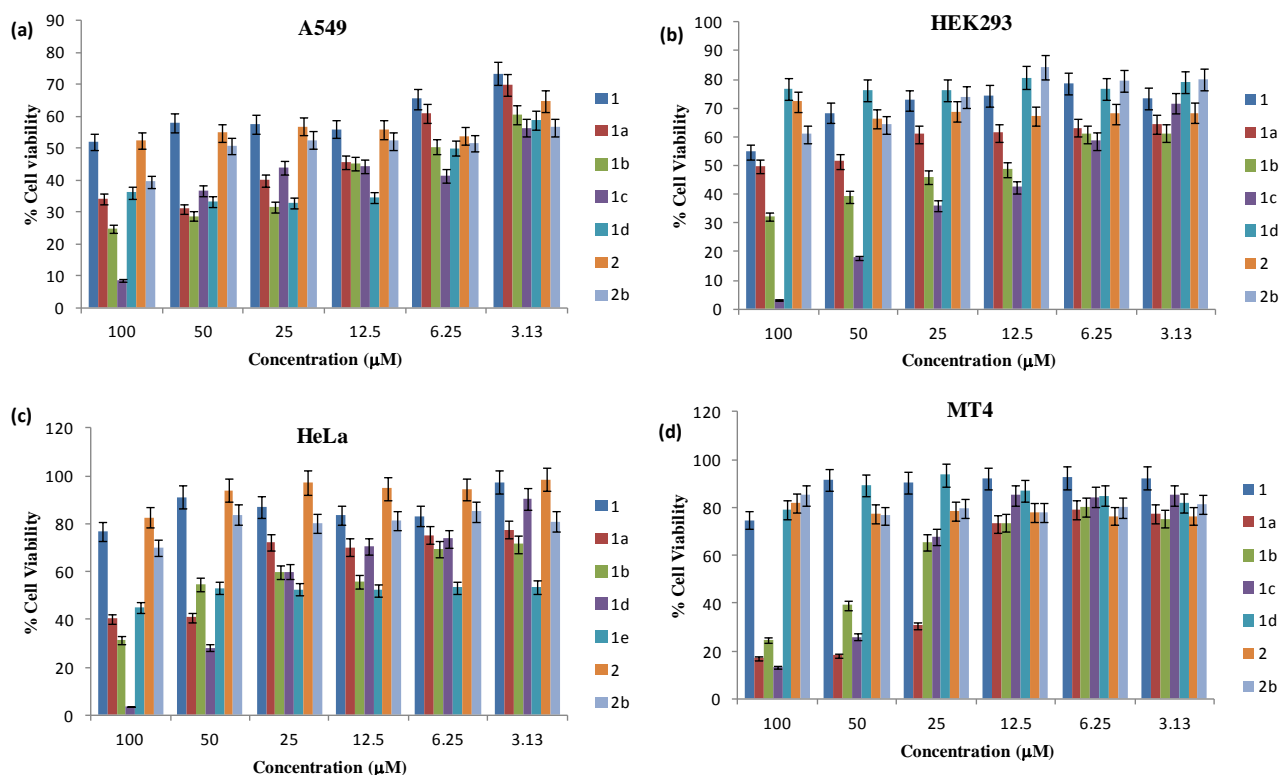

**Figure S12:** Colorimetric MTS assay results for the triazolyl conjugated complexes (**1(a-d)** and **2b**) evaluated against MT4 (leukemia), HeLa (cervical), HEK293 (kidney adenocarcinoma) and A549 (lung cancer) cell lines at six two-fold dilutions (100  $\mu\text{M}$ , 50  $\mu\text{M}$ , 25  $\mu\text{M}$ , 12.5  $\mu\text{M}$ , 6.25  $\mu\text{M}$  and 3.13  $\mu\text{M}$ ). The data was collected in duplicate for three independent measurements and reported as mean  $\pm$  SEM with  $n = 6$ , with the plus caps representing the standard error of mean bars. Auranofin was used as the positive control.

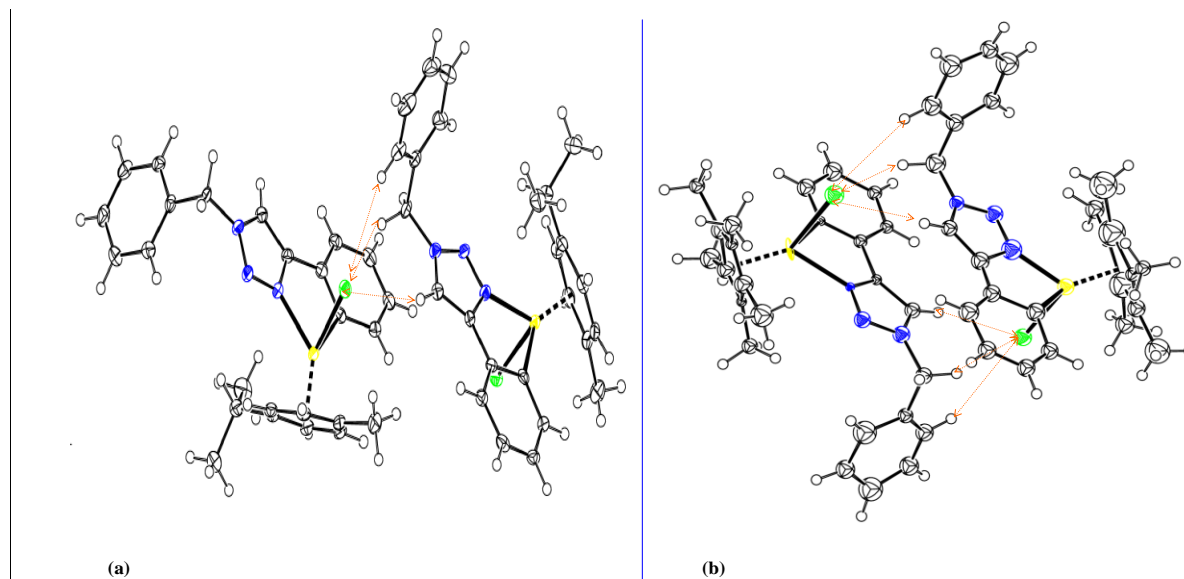

**Figure S13:** Displacement thermal ellipsoids plot with 50 % probability of the dimeric units in the molecular structures of 1-benzyl-4-phenyl-1*H*-1,2,3-triazolyl (**a**) (*p*-cymene)ruthenium(II) dichloride complex, **1a** and (**b**) (pentamethylcyclopentadienyl)iridium(III) chloride, **1c**.

## SUPPORTING INFORMATION

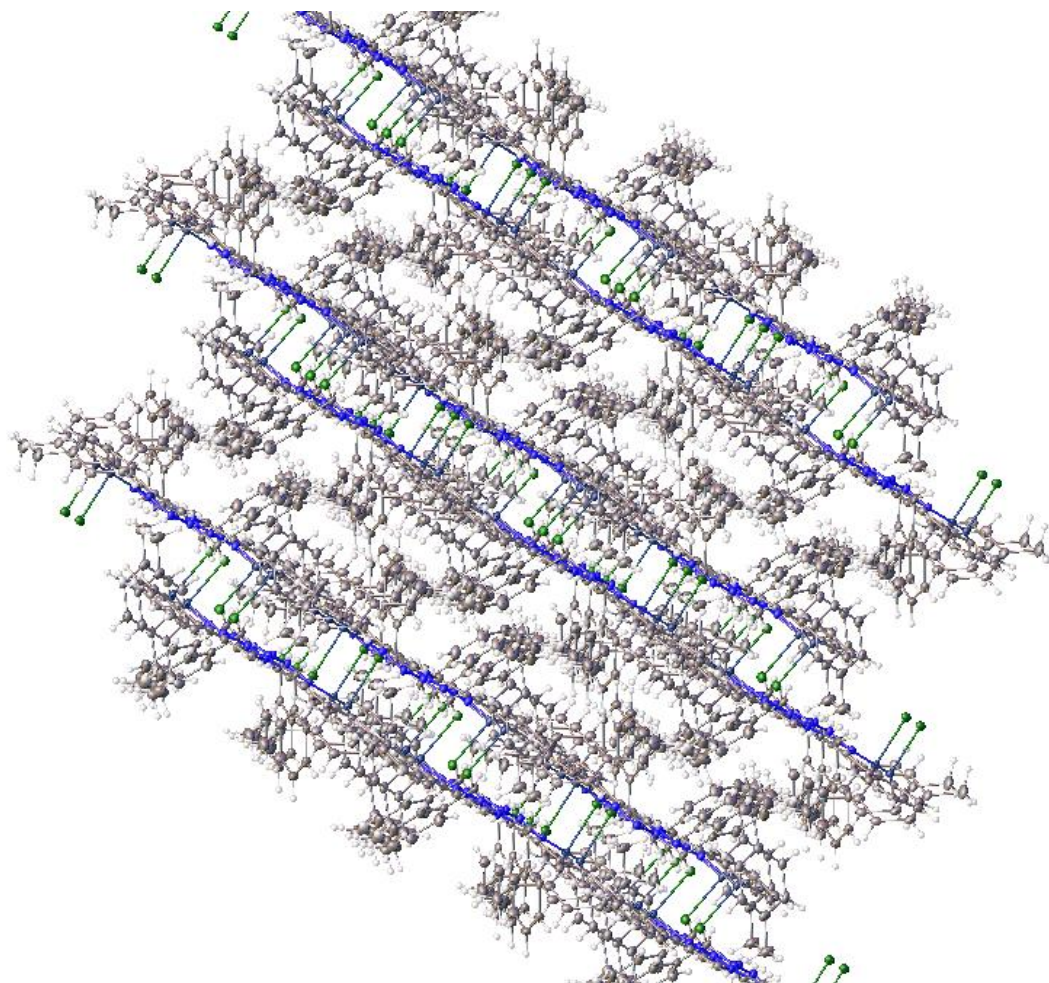

**Figure S14:** Molecular packing in the crystal structure of 1-benzyl-4-phenyl-1*H*-1,2,3-triazolyl (*p*-cymene)ruthenium(II) dichloride complex, **1a**.

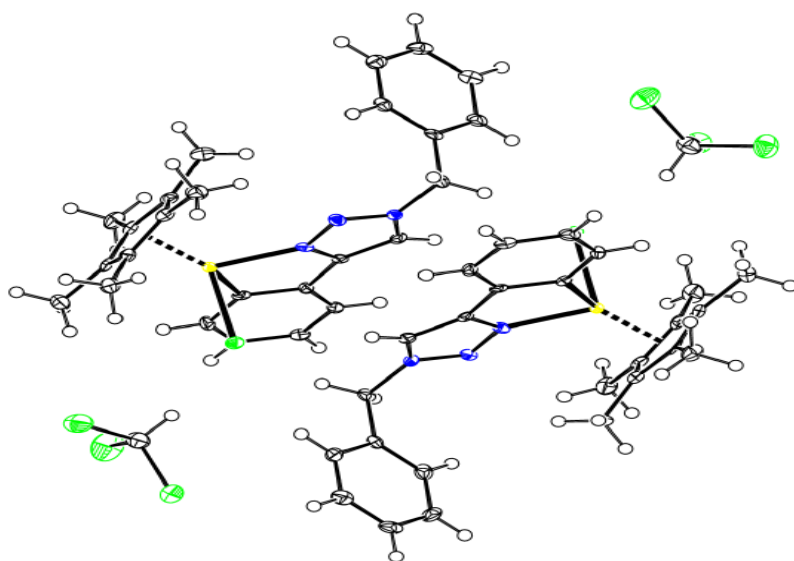

**Figure S15:** Displacement thermal ellipsoids plot with 50 % probability of the dimeric units in the molecular structures of 1-benzyl-4-phenyl-1*H*-1,2,3-triazolyl (pentamethylcyclopentadienyl)rhodium(III) chloride, **1b**, which co-crystallized with chloroform.

## SUPPORTING INFORMATION

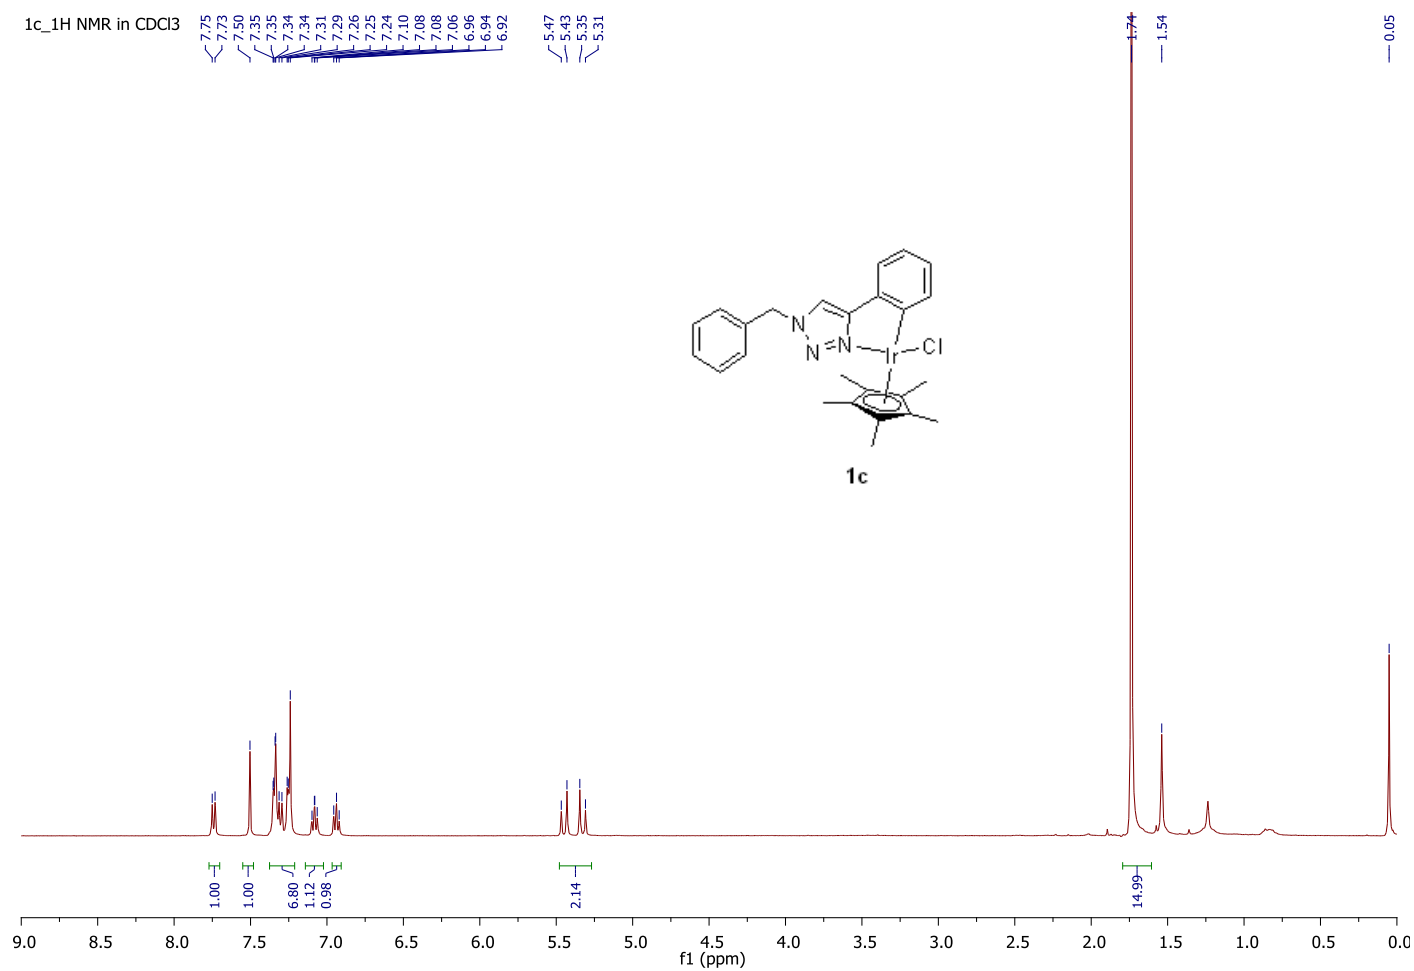

**Figure S16:** <sup>1</sup>H NMR spectrum of 1-benzyl-4-phenyl-1*H*-1,2,3-triazolyl-(pentamethylcyclopentadienyl)iridium(III) chloride complex **1c** in CDCl<sub>3</sub> recorded using a 400 MHz FTNMR spectrometer.

## SUPPORTING INFORMATION

RK-C14-DMSO

MS\_Direct\_180822\_25 21 (0.133) Cm (13.23)

1: TOF MS ES+  
2.53e5

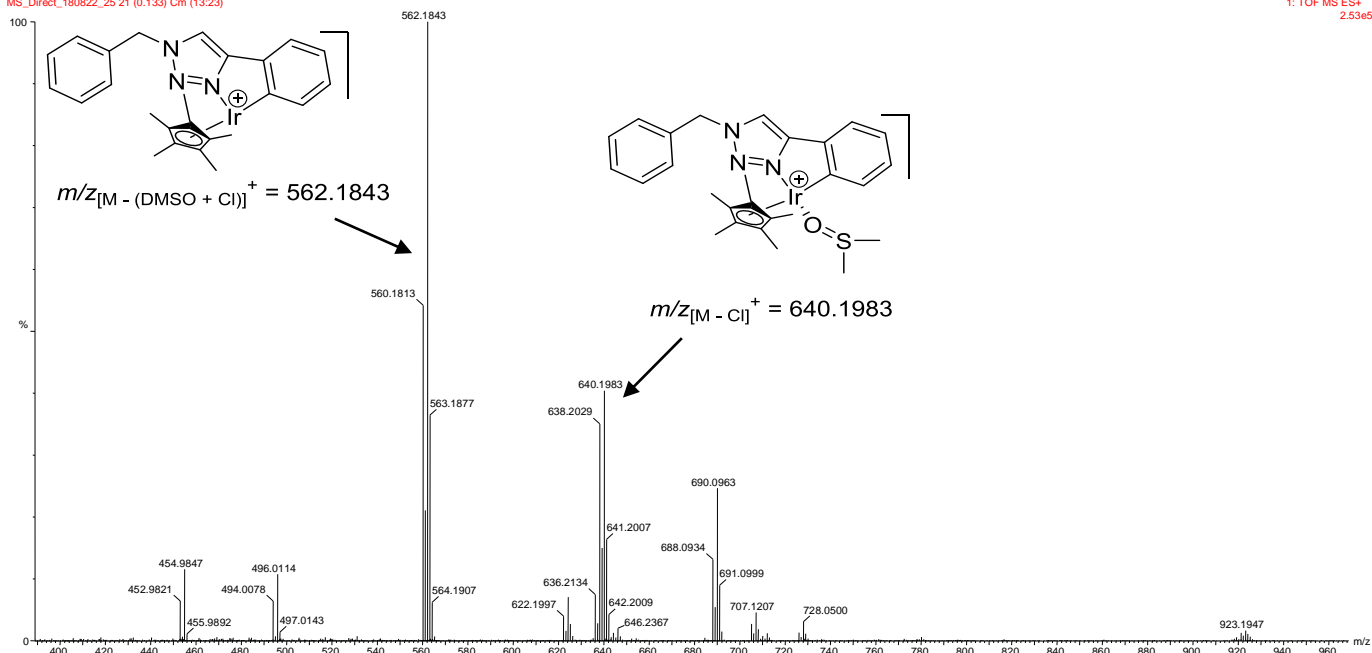

**Figure S17:** HRMS-ESI spectrum for cyclometallated 1-benzyl-4-phenyl-1*H*-1,2,3-triazolyl (pentamethylcyclopentadienyl)(DMSO)iridium(III) chloride cationic complex, **1c-dmsO**, obtained by incubation of iridacycle **1c** in dimethyl sulfoxide and water solvent system at 313 K.

## SUPPORTING INFORMATION

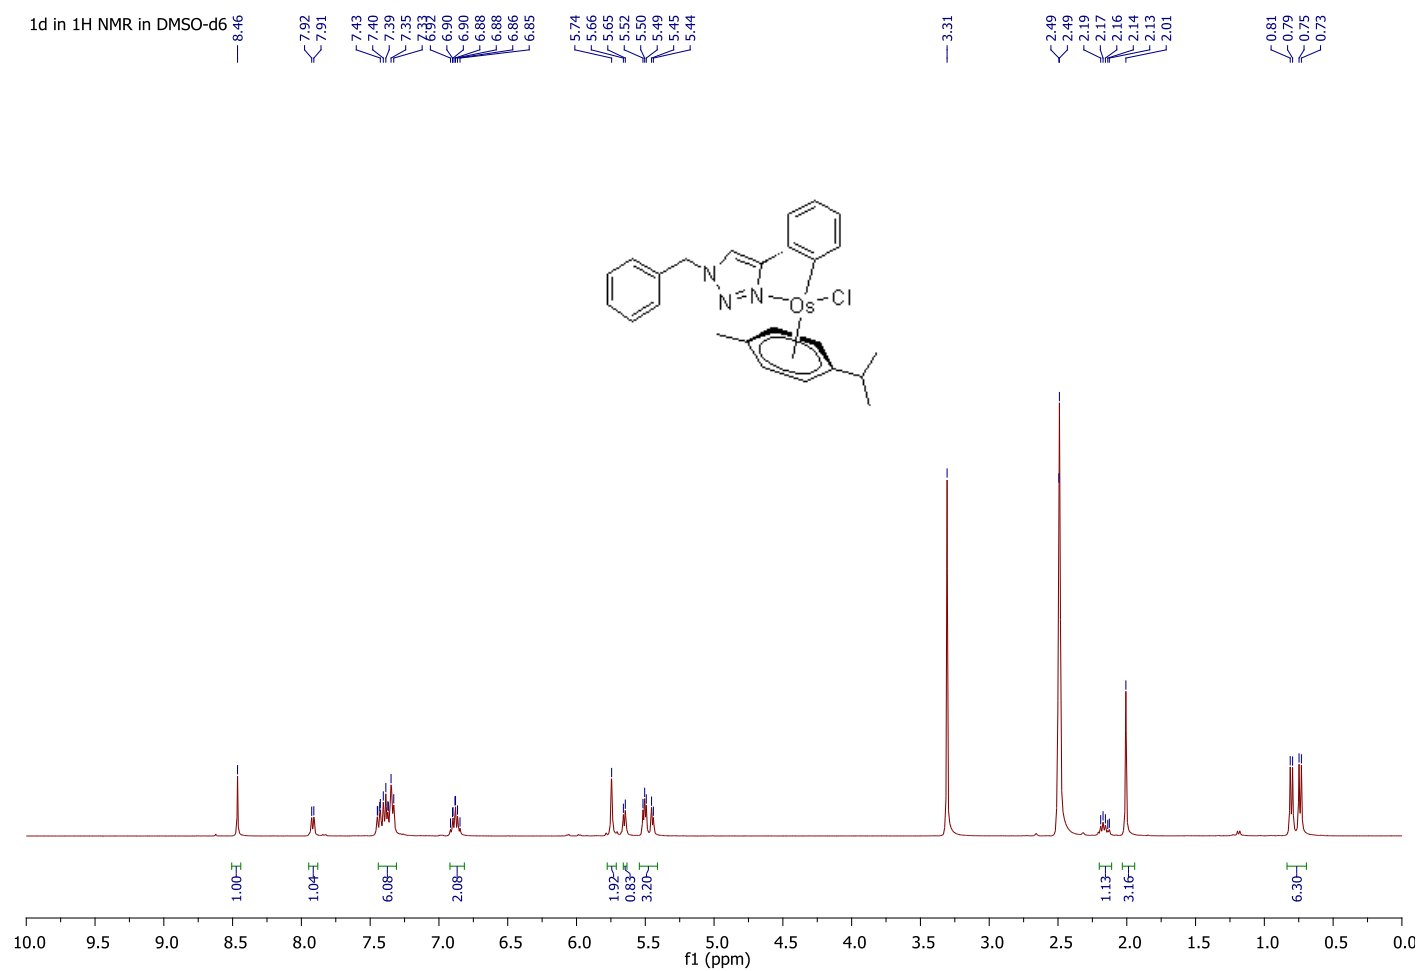

**Figure S18:**  $^1\text{H}$  NMR spectrum of conjugated 1-benzyl-4-phenyl-1*H*-1,2,3-triazolyl (*p*-cymene)osmium(II) chloride 5-membered metallacycle, **1d**, in  $\text{DMSO}-d_6$  recorded using a 400 MHz FTNMR spectrometer.



## SUPPORTING INFORMATION

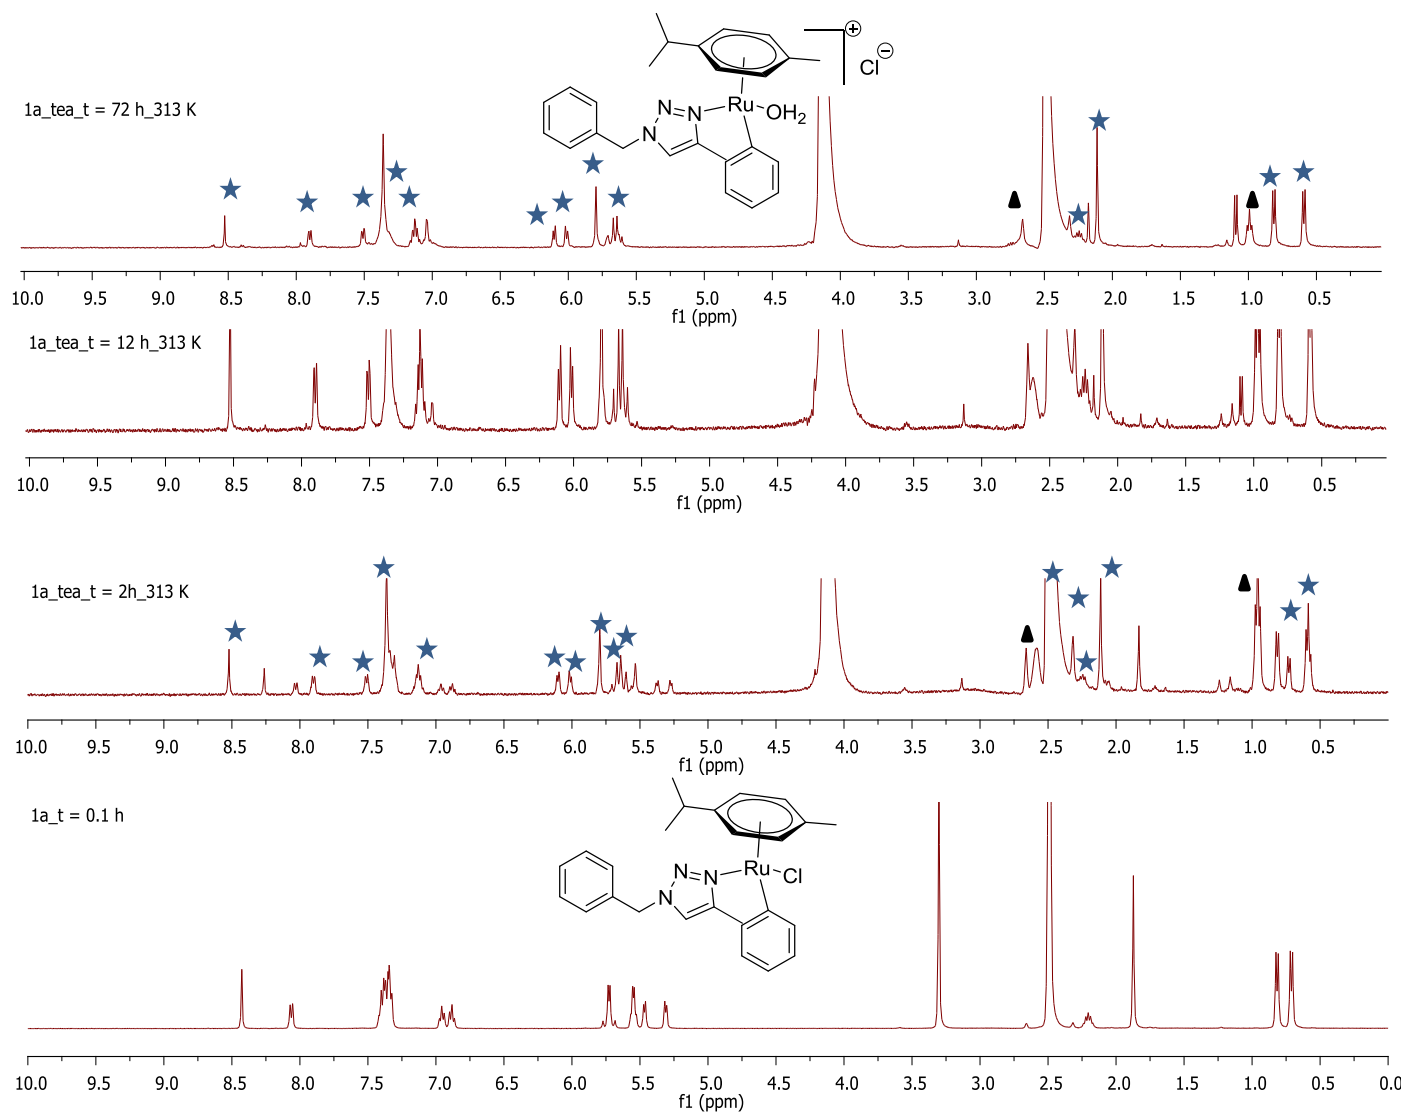

**Figure S19:** Time dependent  $^1\text{H}$  NMR spectra showing the formation of aquated complex of **1a** in the presence of triethyl amine ( $\blacktriangle$ ) recorded in  $\text{DMSO-}d_6$  in  $\text{D}_2\text{O}$  using a 400 MHz FTNMR spectrometer. At  $t = 0.1$  h, the neutral chloride complex **1a** (lower spectrum) is the predominant species; after 2 h of incubation of complex **1a** in aqueous conditions, the cationic aquated complex **1a** ( $\star$ ) is almost in equilibrium with the neutral complex **1a** while the cationic aquated complex **1a** is the predominant species after  $t = 12$  h. There was no detectable deprotonation of the triazolyl proton H-5 in both the neutral complex **1a** and the cationic aquated complex of **1a**.

## SUPPORTING INFORMATION

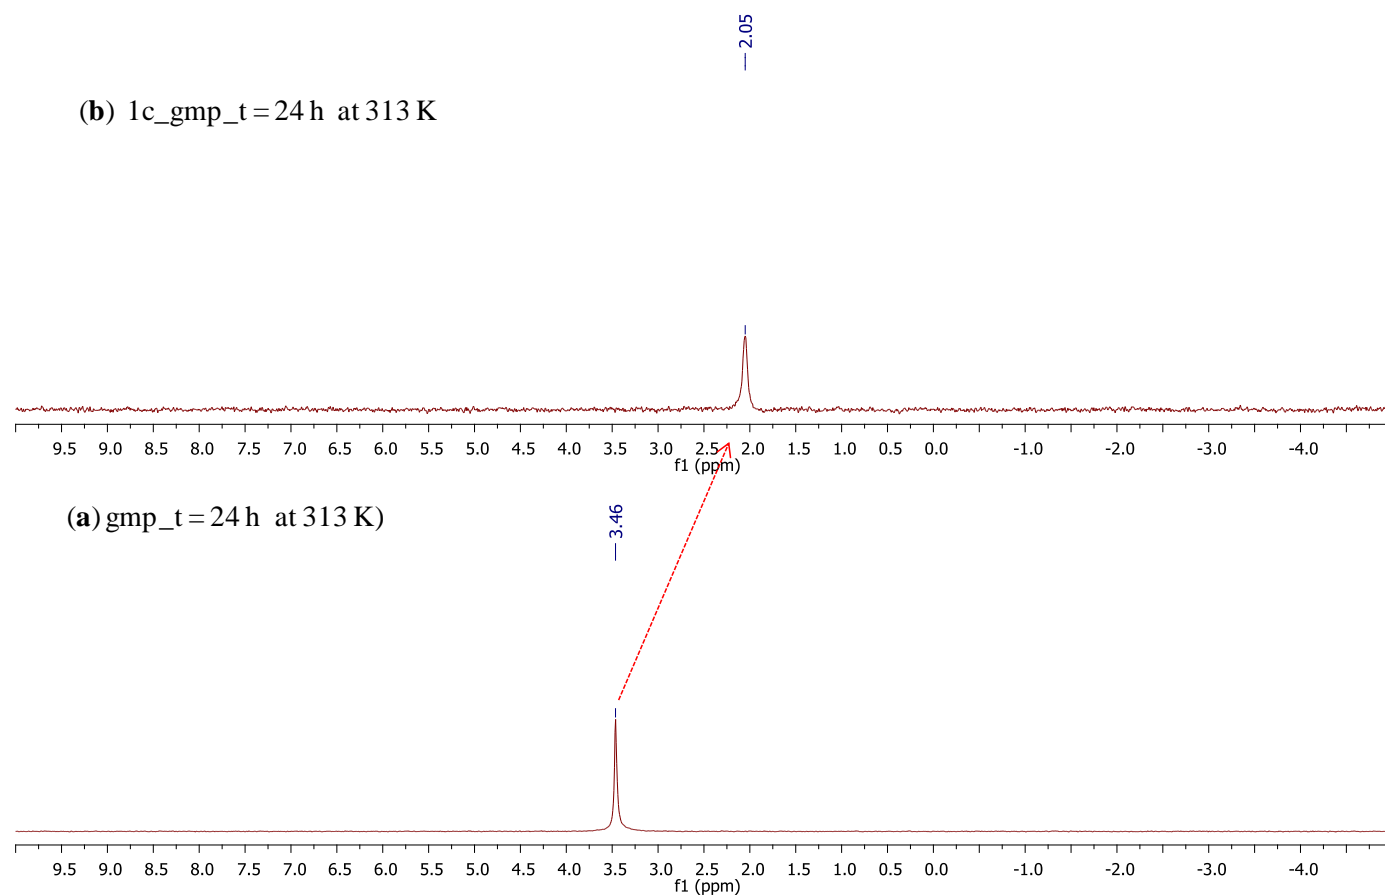

**Figure S20:**  $^{31}\text{P}\{^1\text{H}\}$  NMR (202 MHz,  $\text{DMSO-}d_6$ ) showing an upfield shift ( $\Delta\delta = -1.41\text{ ppm}$ ) in the phosphorous peak of DNA model guanosine 5'-GMP upon incubation with complex **1c** at 313 K for 24 h in the process of carbenylation. (a)  $^{31}\text{P}\{^1\text{H}\}$  NMR (202 MHz,  $\text{DMSO-}d_6$ ) of free DNA model guanosine 5'-GMP (b)  $^{31}\text{P}\{^1\text{H}\}$  NMR (202 MHz,  $\text{DMSO-}d_6$ ) of **1c**-5'-GMP complex upon after 24 h of incubation at 313 K.

## SUPPORTING INFORMATION

5'-GMP in dms<sub>o</sub>-d<sub>6</sub>- t = 24 h at 313 K

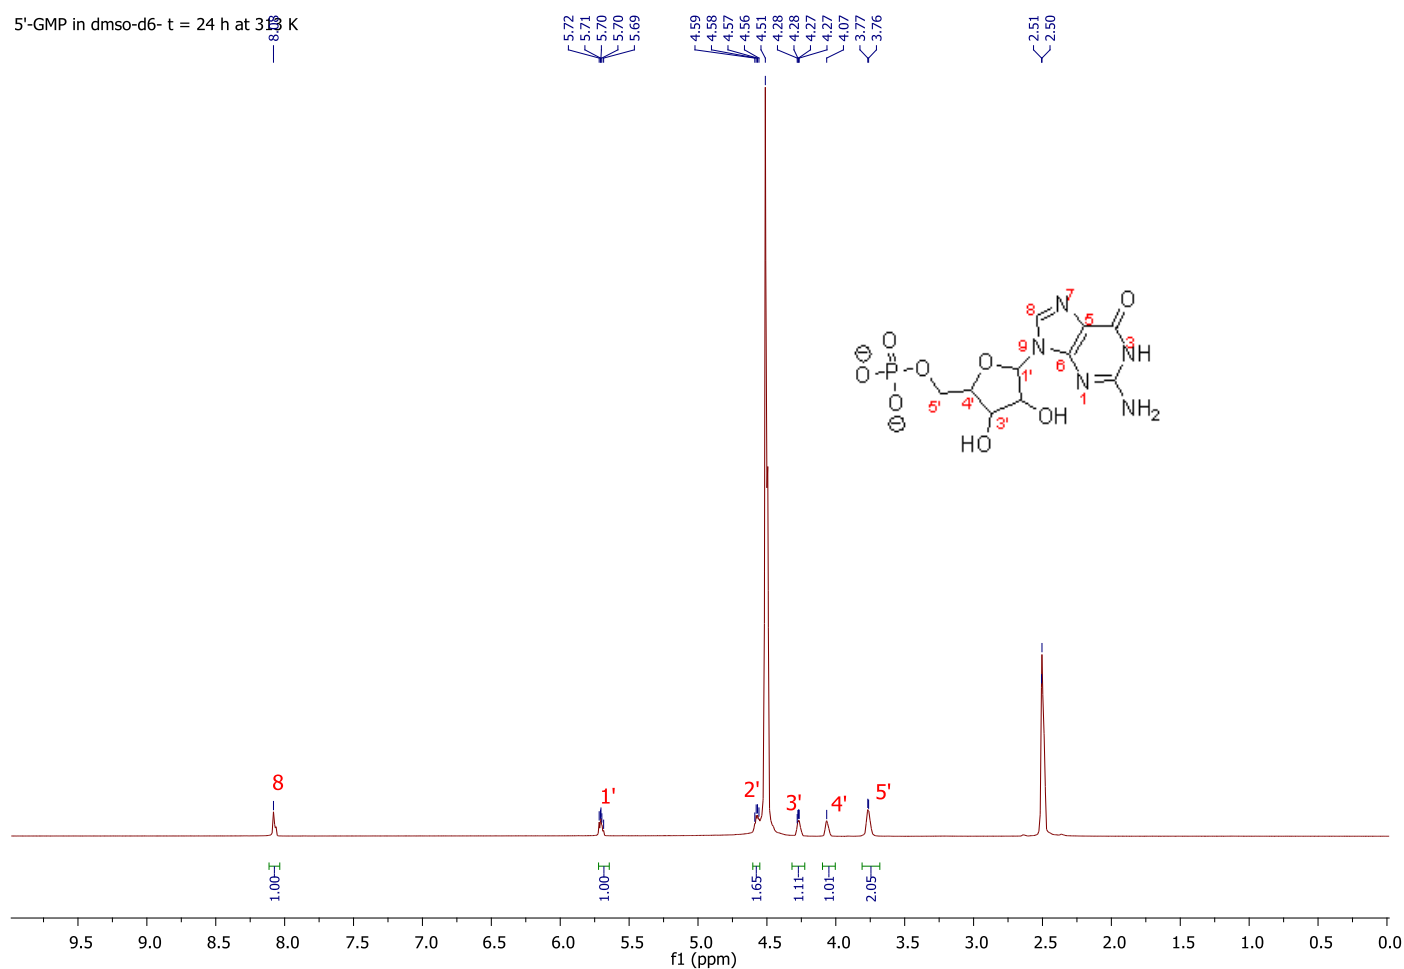

**Figure S21:**  $^1\text{H}$  NMR (500 MHz, DMSO- $d_6$ ) of DNA model guanosine 5'-GMP upon incubation with complex **1c** at 313 K for 24 h.

## SUPPORTING INFORMATION

### Incubation of complex **1c** with 2-methylimidazole

In a typical experiment, an aqueous solution (0.2 mL) of 2-methylimidazole (0.45 mg, 1.0 equiv) was added in one portion to an incubating aqueous solution of aquated complex **1c** (3 mg,  $5.0 \times 10^{-3}$  mmol, 1.0 equiv) in 50 % DMSO- $d_6$  in  $mQH_2O$  at 313 K. Subsequently, the  $^1H$  NMR spectrum of the complex solution was recorded immediately, then at intervals of 12 h for a period of 120 h. **Figure S22** (ESI) shows selected  $^1H$  NMR spectra of the complex mixture after 2 h, 24 h and 48 h as supportive evidence of the formation of  $k^1N$ -1c-2MeIm complex isomeric mixture (\*). There was no significant difference between the spectra recorded after 2 h and that of 12 h as well as between 48 h and 120 h of incubation.

**Scheme S1:** Incubation of complex **1c** and 2-methylimidazole mixture forms  $k^1N$ -1c-2MeIm complex

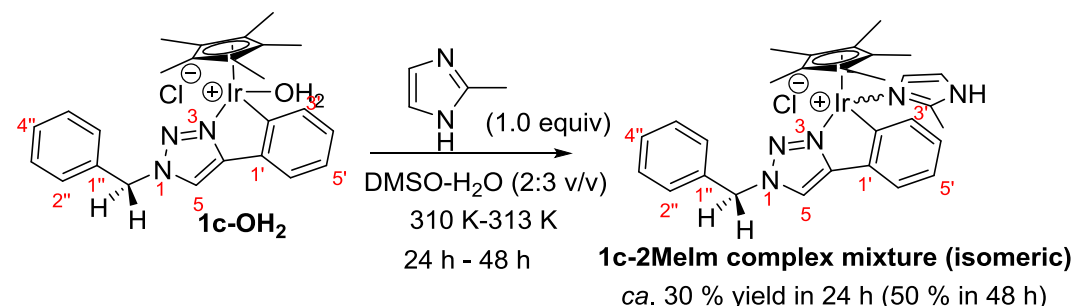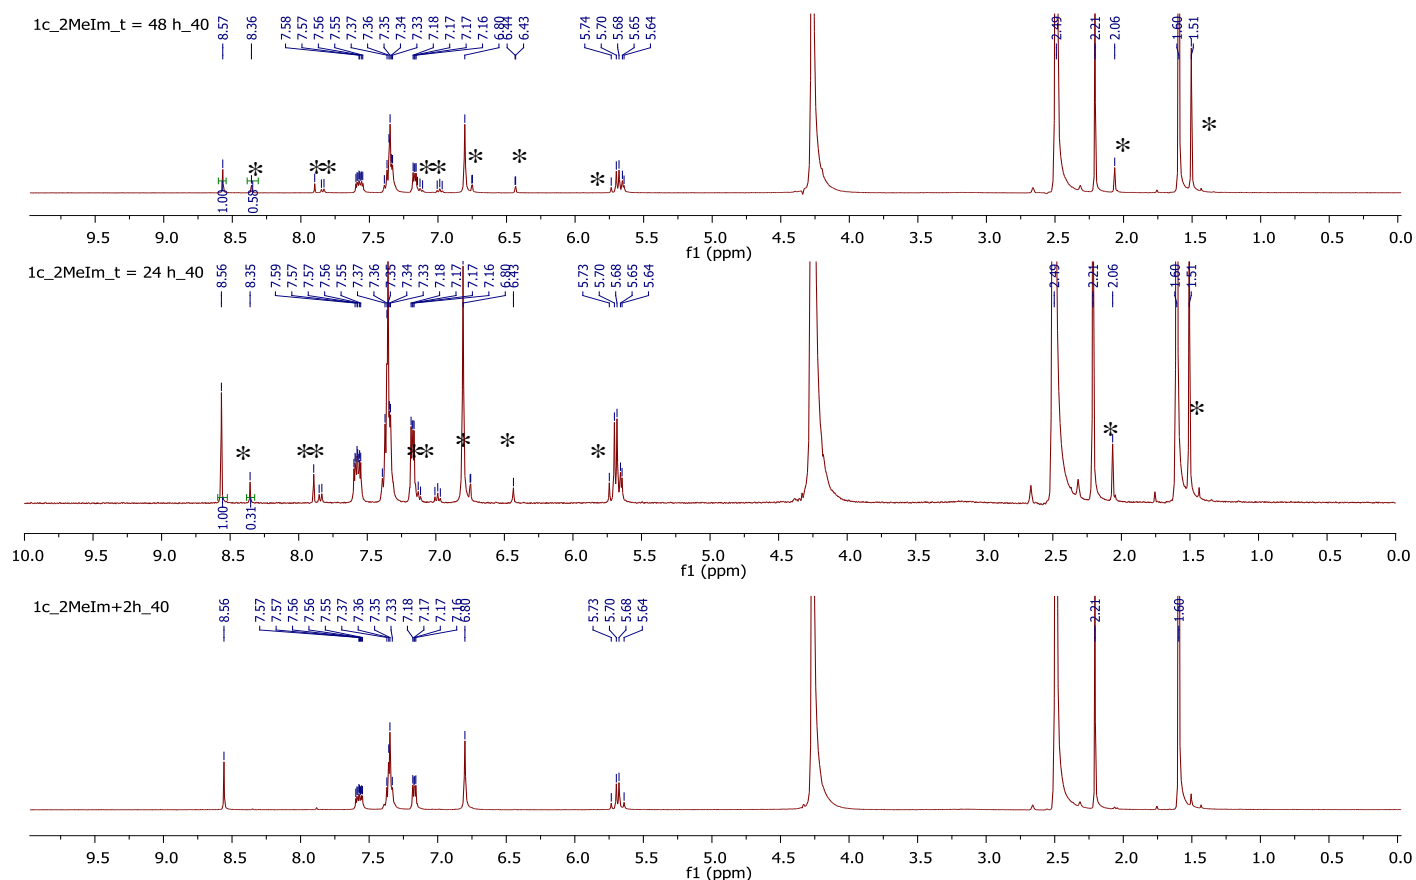

**Figure S22:**  $^1H$  NMR spectra (400MHz, DMSO- $d_6$ ) upon incubation of complex **1c** with 2-methylimidazole for 48 h at 313 K; showing the emergence and growth of  $k^1N$ -1c-2MeIm coordination complex of **1c** (\*) recorded after 2 h, 24 h and 48 h of incubation.

## SUPPORTING INFORMATION

**pKa determination.** A plot of pH versus the resonance shift of the methylene protons was obtained by incubation of the mixture for about 12 h at 313 K (**Figure S23**).

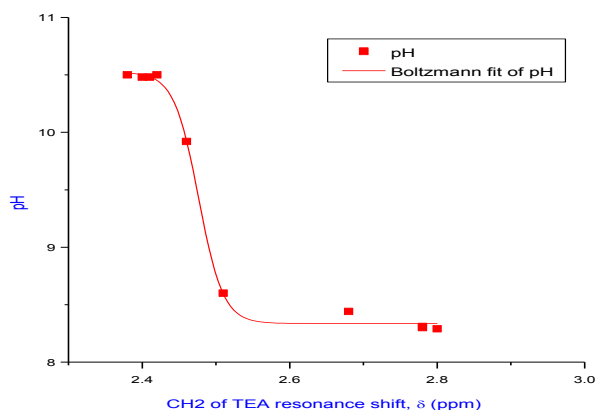

**Figure S23:** Scatter plot of pH versus resonance shift,  $\delta$ , of the  $\text{CH}_2$  in triethyl amine obtained over a duration of 12 h following deprotonation of triazole proton H-5 in complex **1c** upon incubation at 313 K for 12 h with pH curve fitted using Boltzmann fitting model ( $R^2 = 0.9974$ ; pKa of triazole H-5 of **1c** is ca. 9.4 from the inflection point of the curve).

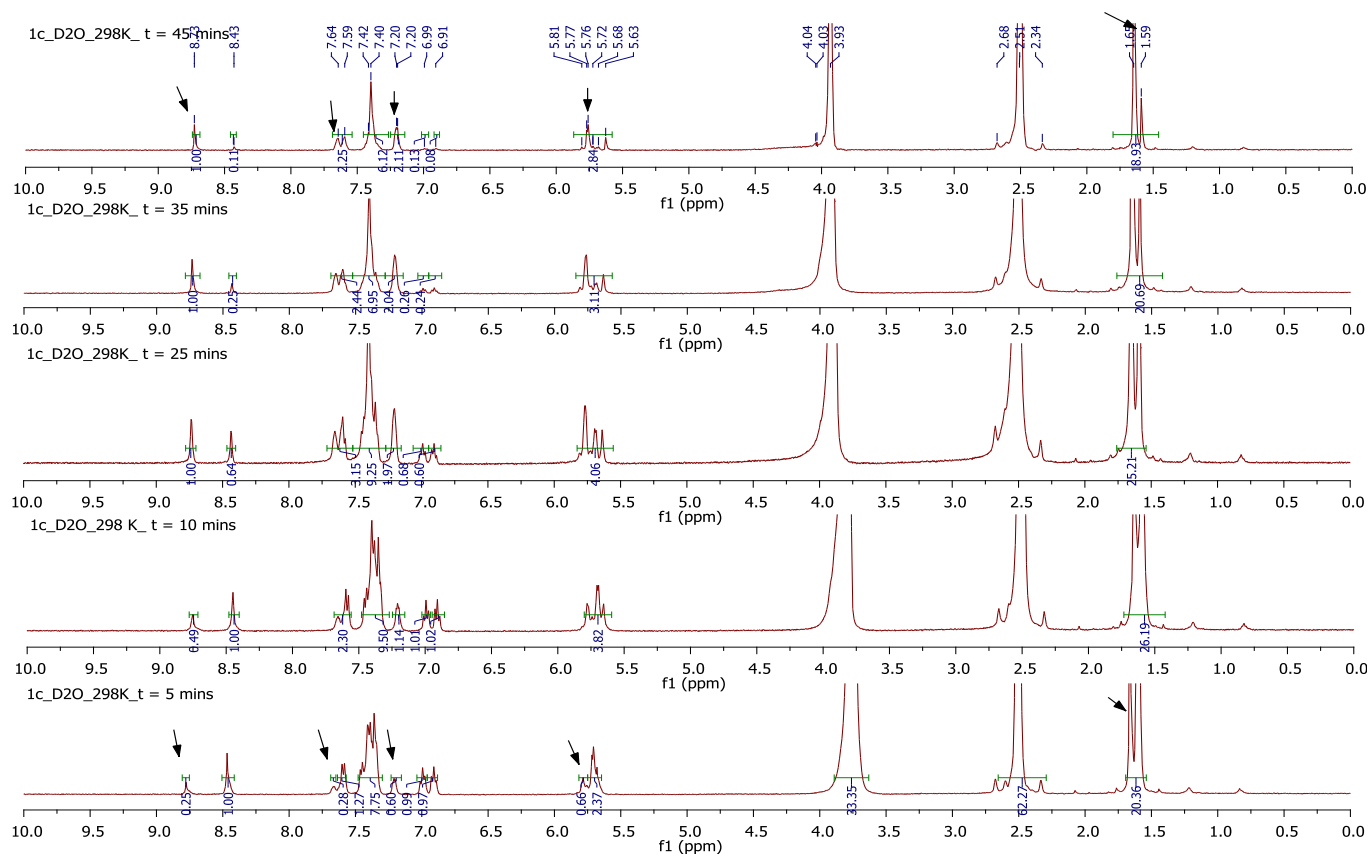

**Figure S24:** Time dependent  $^1\text{H}$  NMR of complex **1c** showing the conversion of the chloride complex **1c** (major compound at  $t = 5$  mins;  $\delta_{\text{H}} = 8.43$  ppm) to the aquated complex **1c** (major compound at  $t = 45$  mins;  $\delta_{\text{H}} = 8.43$  ppm, shown by arrows). The spectrum was recorded in  $\text{dmsO}-d_6$  using 400 MHz FTNMR. The spectrum recorded at  $t = 5$  mins shows the emergence of a new set of signals corresponding to the aquated complex **1c** (shown by arrows) each downfield with respect to that chloride complex **1c**.

## SUPPORTING INFORMATION

**Behavior of complex **1a** and **1c** in aqueous environment in the presence of amino acids:** Interaction of these complexes with amino acids, L-cysteine, L-Proline, DL-proline and L-histidine were evaluated for an extended duration of 168 h – 240 h at incubation temperature of 313 K. **Figure S25** shows an overlay of the  $^1\text{H}$  NMR spectra of the aquated complex **1c**, **1c**+proline and **1c**+cysteine. **Figure S26** and **S27** show  $^1\text{H}$  NMR spectra of complex **1c** and **1a** respectively with histidine as one of the representative amino acids containing potentially coordinating imidazole moiety.

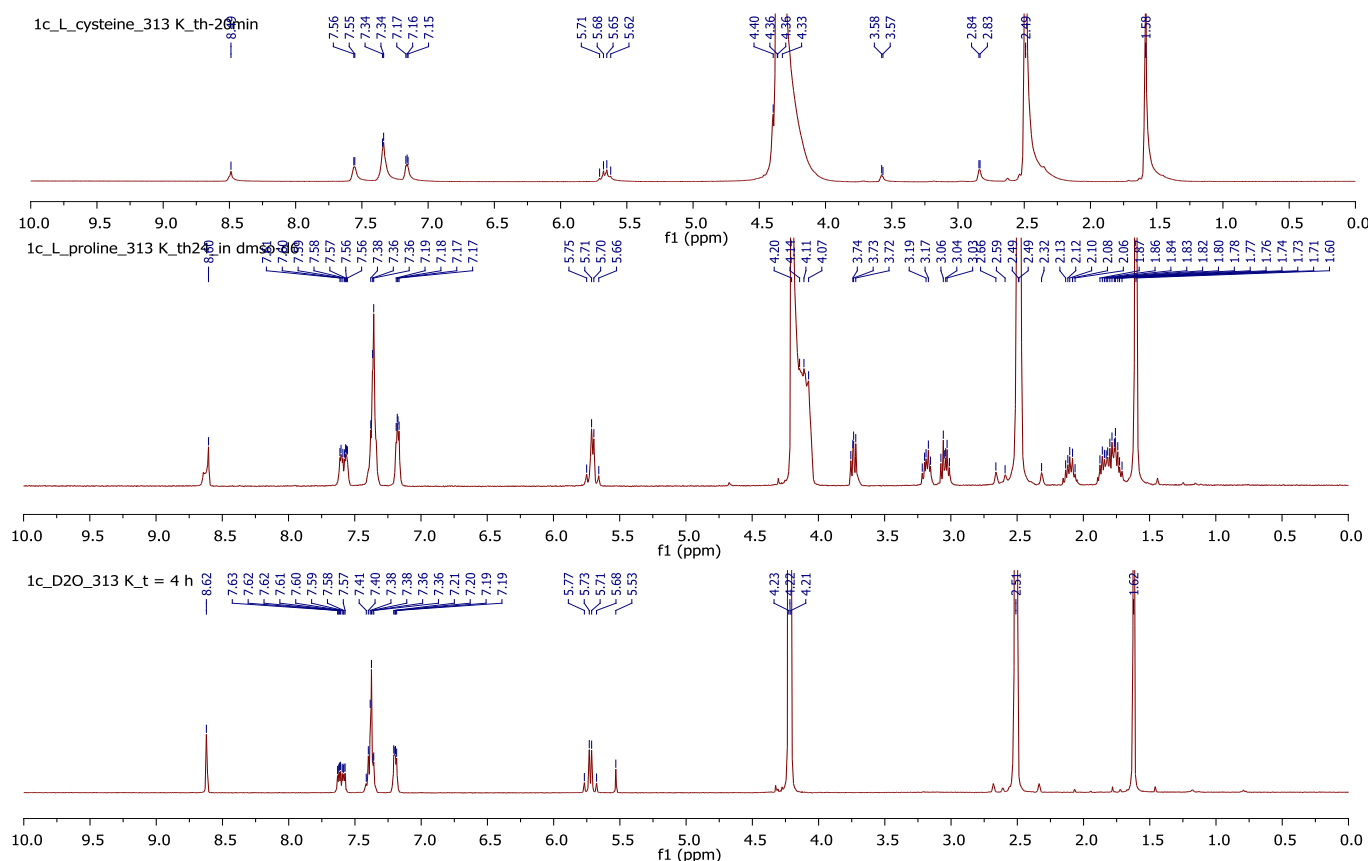

**Figure S25:** Comparison of time dependent  $^1\text{H}$  NMR (500MHz,  $\text{DMSO}-d_6$ ) of aquated complex **1c**, L-proline and L-cysteine amino acid molecules upon incubation for a period of 24 h at 313 K. The spectra show good similarity for complex **1c** signals between the aquated complex **1c** and that of **1c**-proline or **1c**-cysteine suggesting absence of bonded interactions between complex **1c** and these amino acids.

**Interaction with histidine:** Inspired by the formation of a coordination adduct on reacting with imidazole to form  $k^1\text{N}$ -imidazolyl complex. Interaction of complex **1a** and **1c** with histidine occurred with varying degrees in a time-dependent manner upon incubation of the mixture at 313 K for an extended period of 240 h. For complex **1c**, small amount of covalently bonded **1c**-histidine adduct (*ca.* 9 %) through  $\text{N1}$  or  $\text{N3}$  was only observed after 192 h (**Figure S26**); with less than 2 % of the adduct observed after 96 h. In contrast, complex **1a** was observed to significantly interact with L-histidine to form  $k^1\text{N}$ -**1a**-histidine adduct within the first 96 h (**Figure S27**), suggesting the possibility of complex **1a** to readily interact with biomolecules such as serum proteins to a good extent under physiological conditions.

## SUPPORTING INFORMATION

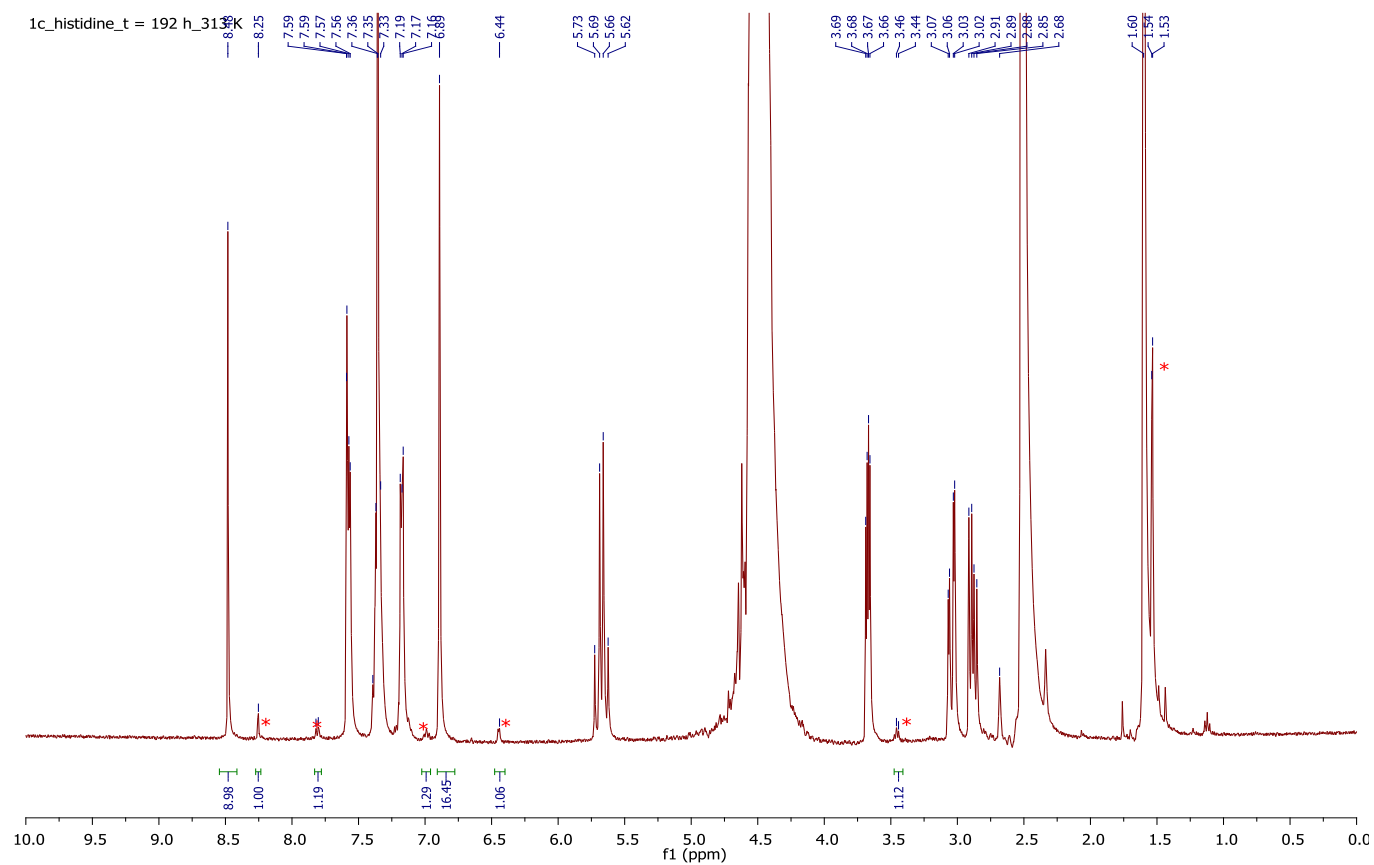

**Figure S26:**  $^1\text{H}$  NMR spectrum (400 MHz,  $\text{DMSO}-d_6$ ) of a mixture of complex **1c** and L-histidine amino acid recorded after 192 h showing traces (< 10 % w.r.t **1c**) of coordination complex  $k^1N$ -**1c**-histidine (\*). There was less than 2 % of the adduct observed after 96 h of incubation of the mixture at 313 K.

## SUPPORTING INFORMATION

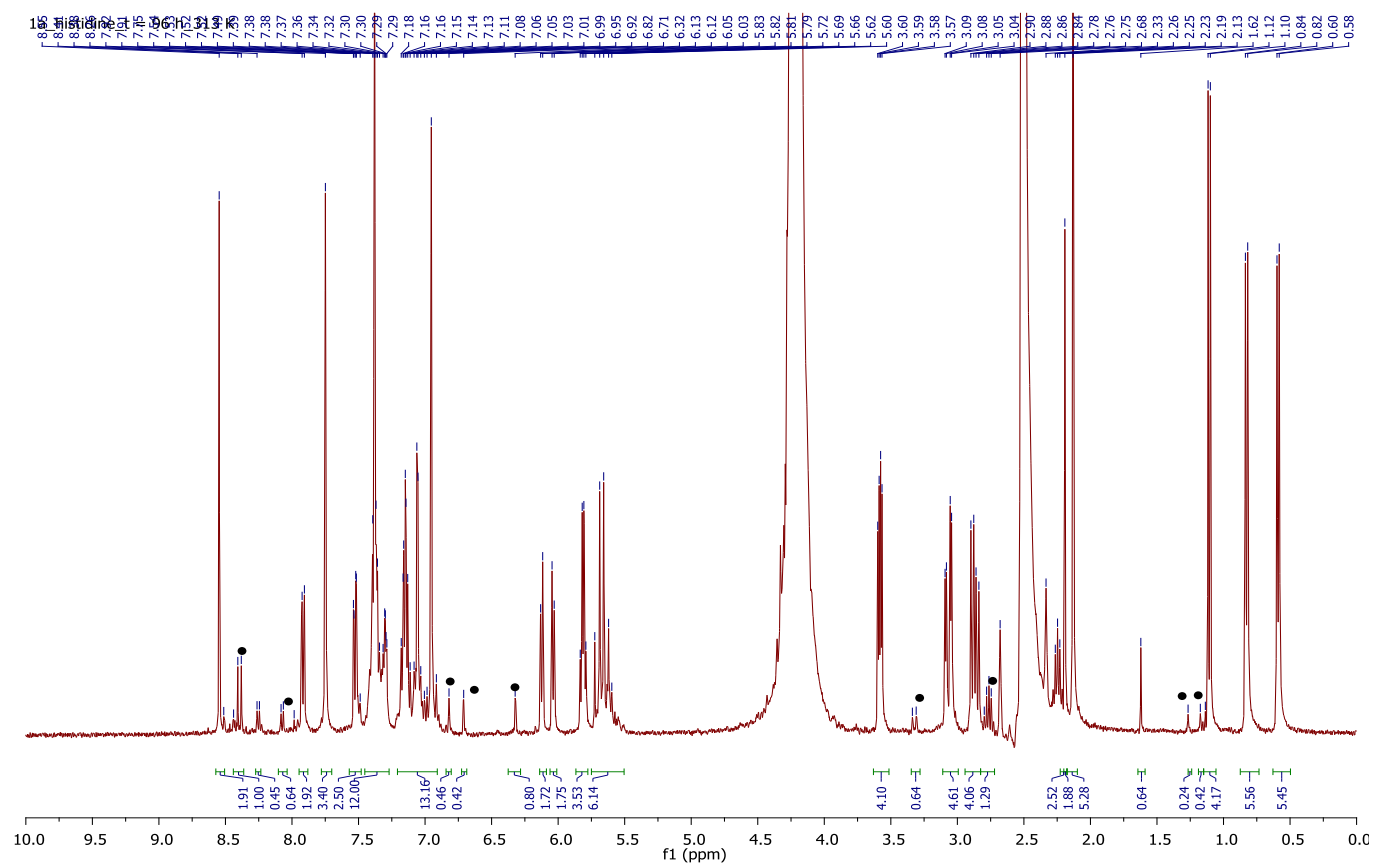

**Figure S27:**  $^1\text{H}$  NMR spectrum (400 MHz,  $\text{DMSO}-d_6$ ) of a mixture of complex **1a** and L-histidine amino acid recorded after 96 h upon incubation at 313 K, showing significant amount ( $> 30\%$ ) of coordination adduct *k*<sup>1</sup>*N*-1a-histidine evidenced by the emergence of a second set of peaks (●).



## SUPPORTING INFORMATION

**Scrambling Experiments: competitive experiments between amino acid and DNA model guanosine biomolecules:** reveals selectivity to DNA model guanosine over amino acids within the experimental time of 24 h.

Scheme S2: Scrambling experiments of **1c** involving proline and 5'-GMP

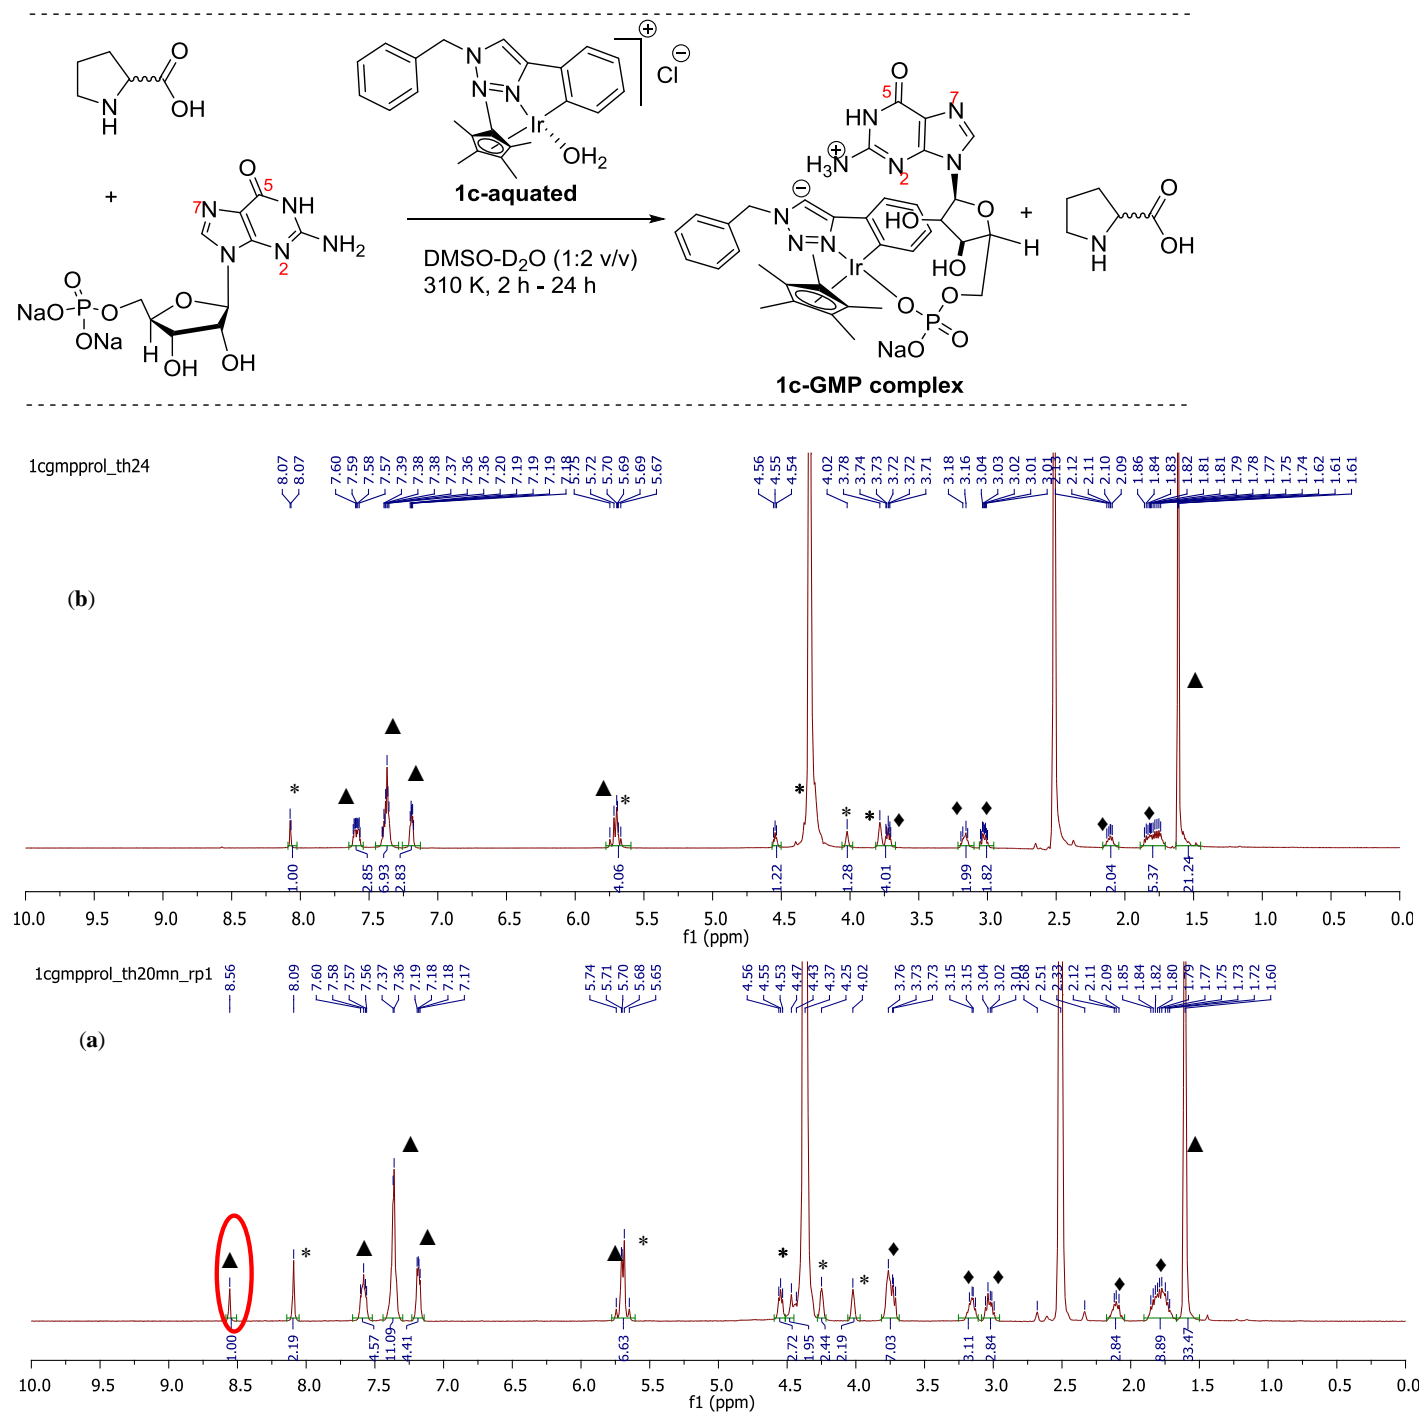

**Figure S28:**  $^1H$  NMR spectrum (500 MHz, DMSO- $d_6$ ) of the reaction mixture of cyclometallated **1c** (▲), L-proline (♦) and 5'-GMP (\*) recorded after 24 hours of incubation at 310 K. Notably, the triazole proton H-5 ( $\delta$  8.56 ppm; circled in red) in (a) of the aquated complex **1c** disappeared after 24

## SUPPORTING INFORMATION

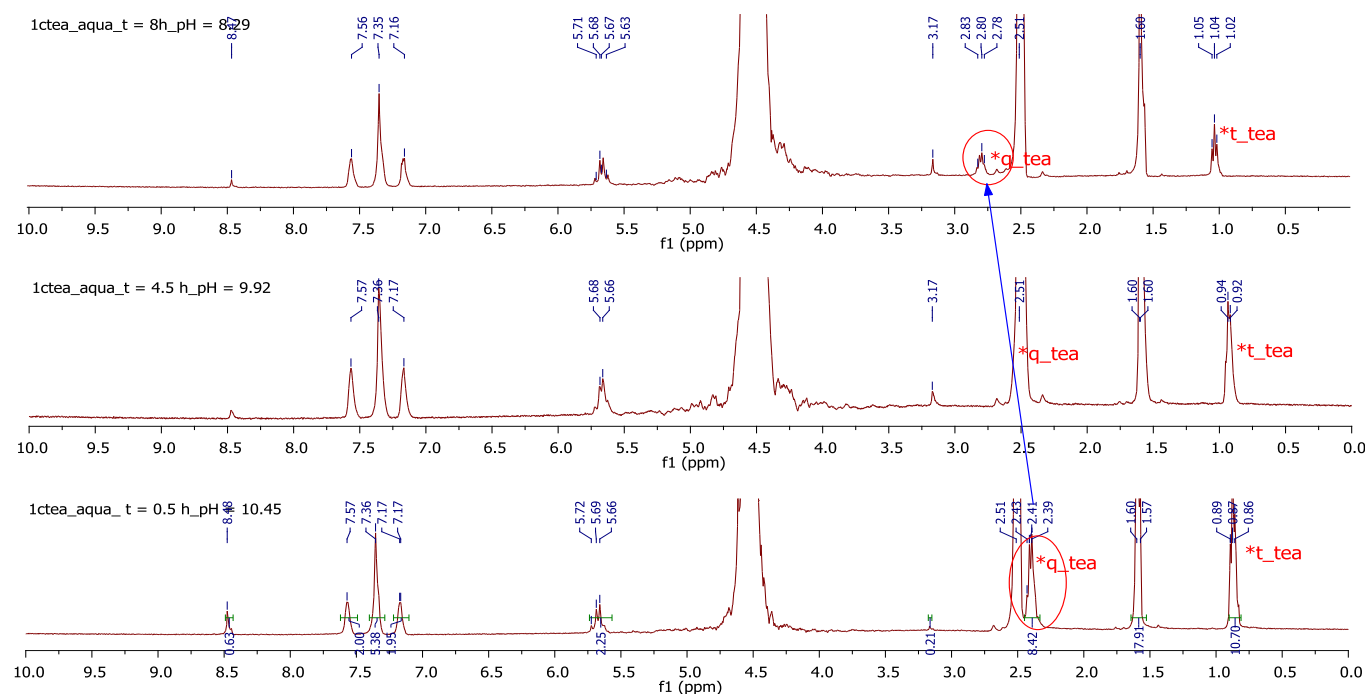

**Figure S29:** Time dependent  $^1\text{H}$  NMR showing the interaction of triethyl amine base with aquated complex **1c**-H<sub>2</sub>O leading to deprotonation of the triazole H-5 proton evidenced by the decreasing intensity of (or rather area under) the triazole proton H-5 signal and the downfield shift of methylene protons ( $\Delta\delta = +0.39$  ppm; red circle: from  $\delta_{\text{H}}$  2.41 ppm  $\rightarrow$   $\delta_{\text{H}}$  2.80 ppm) of triethyl amine corresponding to protonated triethyl amine.

**1D NOESY experiments:** Transient NOEs for **1a\_I** and **1a\_II** on selective irradiation of  $\delta_{\text{H}}$  7.52 ppm (i.e. triazole proton H-5) are shown in Figure S7 using a mixing time,  $d_8 = 0.3\text{s}$ . Build up experiments at different mixing times ( $d_8 = 0.01\text{s}$  -  $1\text{s}$ ) and 2D-NOESY were used to establish appropriate NOEs from artifacts. The % NOE was estimated by calculating percent integral ratio of the NOE peak to that of the saturation peak.

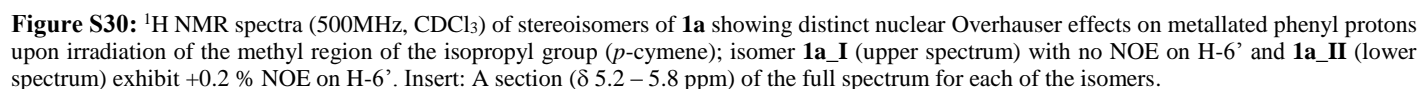

**UV-Vis Spectroscopic BSA-1c titration.** Treatment of 1% DMSO-PBS solution of BSA with various concentrations (2.5  $\mu$ M, 5  $\mu$ M, 7.5  $\mu$ M, 8  $\mu$ M, 9  $\mu$ M, 10  $\mu$ M and 12.5  $\mu$ M) of 1% DMSO-PBS solution of complex **1c** gave the absorption curves shown in Figure **1b**. The absorption intensity of BSA-**1c** complex increased with increasing concentration of complex **1c**. The absorption peaks at  $\lambda = 239.50$  nm and  $\lambda = 278.50$  nm are ascribed to the peptide and the aromatic ring of the aromatic amino acids, respectively.<sup>1</sup>

## SUPPORTING INFORMATION

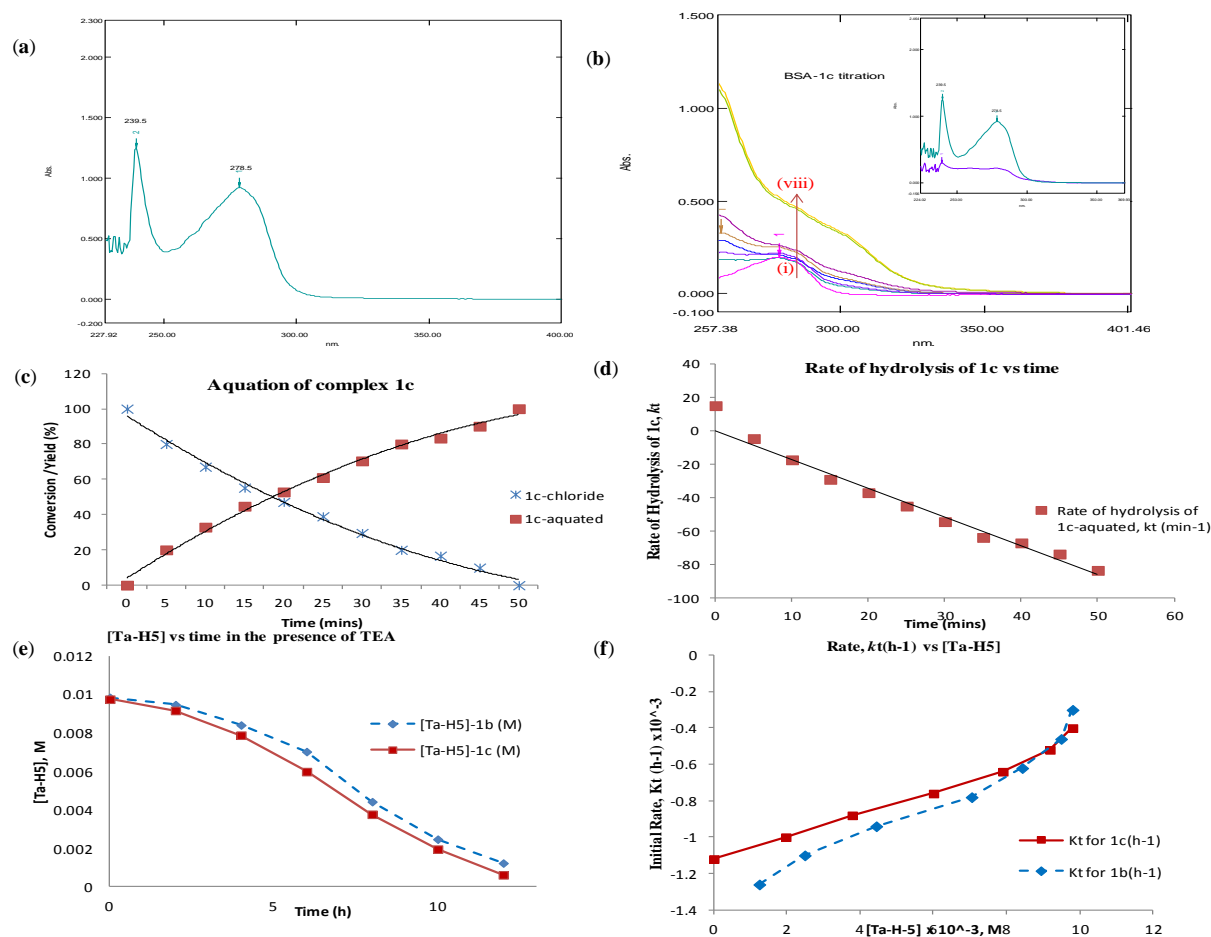

**Figure S31:** UV-Vis absorption curves of (a) 10  $\mu\text{M}$  BSA only (b) BSA titration curves with **1c**: (i) BSA only (2  $\mu\text{M}$ ) and BSA with (ii) 5  $\mu\text{L}$  (iii) 10  $\mu\text{L}$  (iv) 15  $\mu\text{L}$  (v) 16  $\mu\text{L}$  (vi) 18  $\mu\text{L}$ , (vii) 20  $\mu\text{L}$  and (viii) 25  $\mu\text{L}$  of 2 mM stock 1 % DMSO-PBS (pH 7.4) solution of complex **1c**. 1% DMSO-PBS solution was used as the reference solution. **Inset:** An overlay of BSA only (green; 10  $\mu\text{M}$  BSA) and BSA (2  $\mu\text{M}$ ) + **1c** (10  $\mu\text{M}$ ) spectra. (c) Relative conversion of complex **1c** ( $\blacksquare$ ) to the cationic aquated complex (\*), **1c**(OH<sub>2</sub>)Cl. (d) Rate of hydrolysis of the chloride complex **1c** to form the aquated complex; rate constant,  $k_{\text{hyd}} = 1.8293 \text{ min}^{-1}$  or  $109.758 \text{ h}^{-1}$  based on time-dependent consumption of complex **1c**. (e) Variations in concentration of triazole proton H-5, [Ta-H5], with time for complexes **1b** (blue) and **1c** (red) in carbenylation, monitored using <sup>1</sup>H NMR spectroscopy. (f) Rate of deprotonation,  $k_t$ , of triazole proton H-5 with time; rate constant,  $k_d = 8.0 \times 10^{-4} \text{ s}^{-1}$  or  $2.88 \text{ h}^{-1}$  for complex **1c**.

From UV-Vis spectrophotometric studies, compound **1c** shows possibly weak or no interaction with bovine serum albumin (BSA) as a model protein following the insignificant changes in the absorption wavelengths of the peptide ( $\lambda = 239.5 \text{ nm}$ ) and the aromatic moieties of the protein ( $\lambda = 278.5 \text{ nm}$ ) (Figure **1a** and **1b**).

## SUPPORTING INFORMATION

Direct\_170919\_56n 18 (0.155) Cm (17:20-1:3)

1: TOF MS ES-  
4.40e3

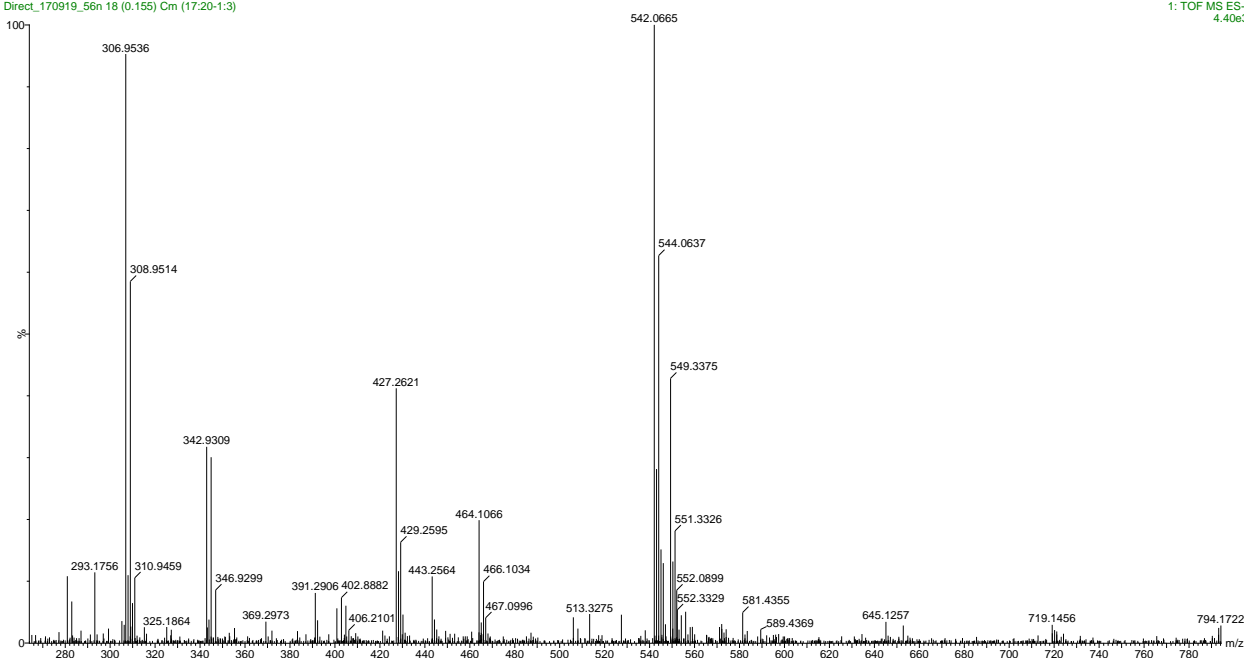

**Figure S32:** HRMS-ESI(-ve) spectrum for cyclometallated 1-benzyl-4-phenyl-1*H*-1,2,3-triazolyl (pentamethylcyclopentadienyl)rhodium(III) chloride complex **1b** showing a peak at  $m/z$  542.0665 corresponding to  $C_{25}H_{27}RhClN_3$   $[M+Cl]^-$ , (calcd  $m/z$  542.0637).

Direct\_170919\_56 31 (0.150) Cm (29:38-1:4)

1: TOF MS ES+  
8.94e6

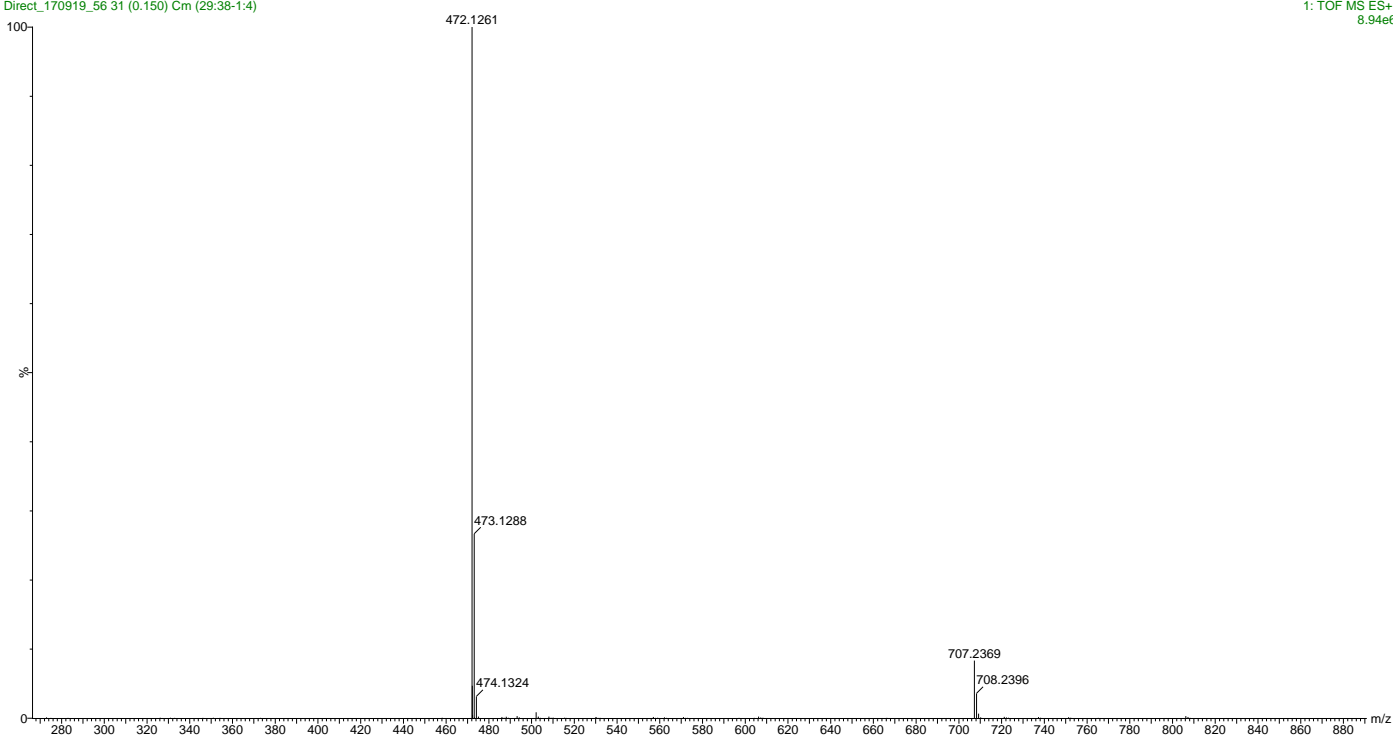

**Figure S33:** HRMS-ESI(+ve) spectrum for cyclometallated 1-benzyl-4-phenyl-1*H*-1,2,3-triazolyl (pentamethylcyclopentadienyl)rhodium(III) chloride complex **1b** showing a base peak at  $m/z$  472.1261 corresponding to  $C_{25}H_{27}RhN_3$   $[M-Cl]^+$ , (calcd  $m/z$  472.1260).

## SUPPORTING INFORMATION

MS\_Direct\_170712\_UJ3 25 (0.128) Cm (24:28)

1: TOF MS ES+  
1.02e6

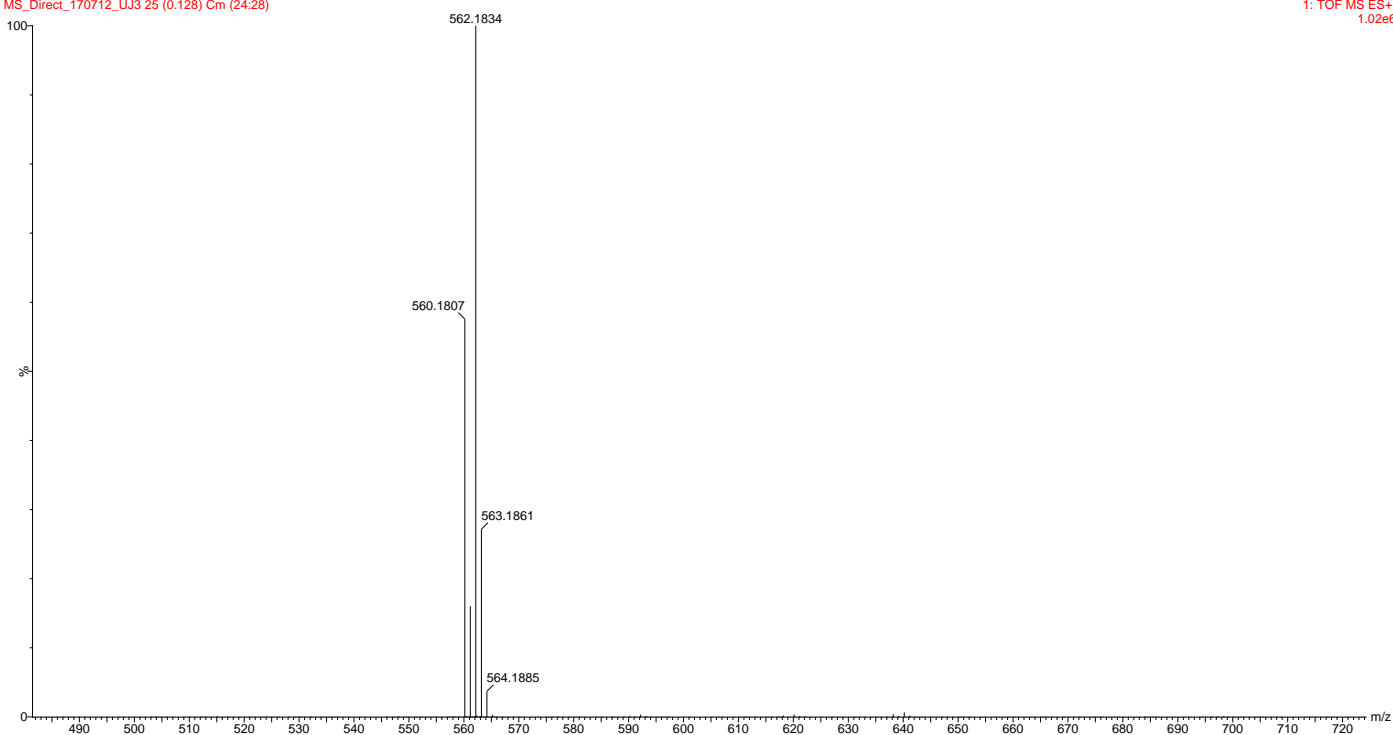

**Figure S34:** HRMS-ESI(+ve) spectrum for cyclometallated 1-benzyl-4-phenyl-1*H*-1,2,3-triazolyl (pentamethylcyclopentadienyl)iridium(III) chloride complex **1c** showing a base peak at  $m/z$  562.1834 corresponding to  $C_{25}H_{27}IrN_3 [M-Cl]^+$ , (calcd  $m/z$  562.1834).

MS\_Direct\_170712\_UJ2 25 (0.128) Cm (23:33)

1: TOF MS ES+  
3.96e4

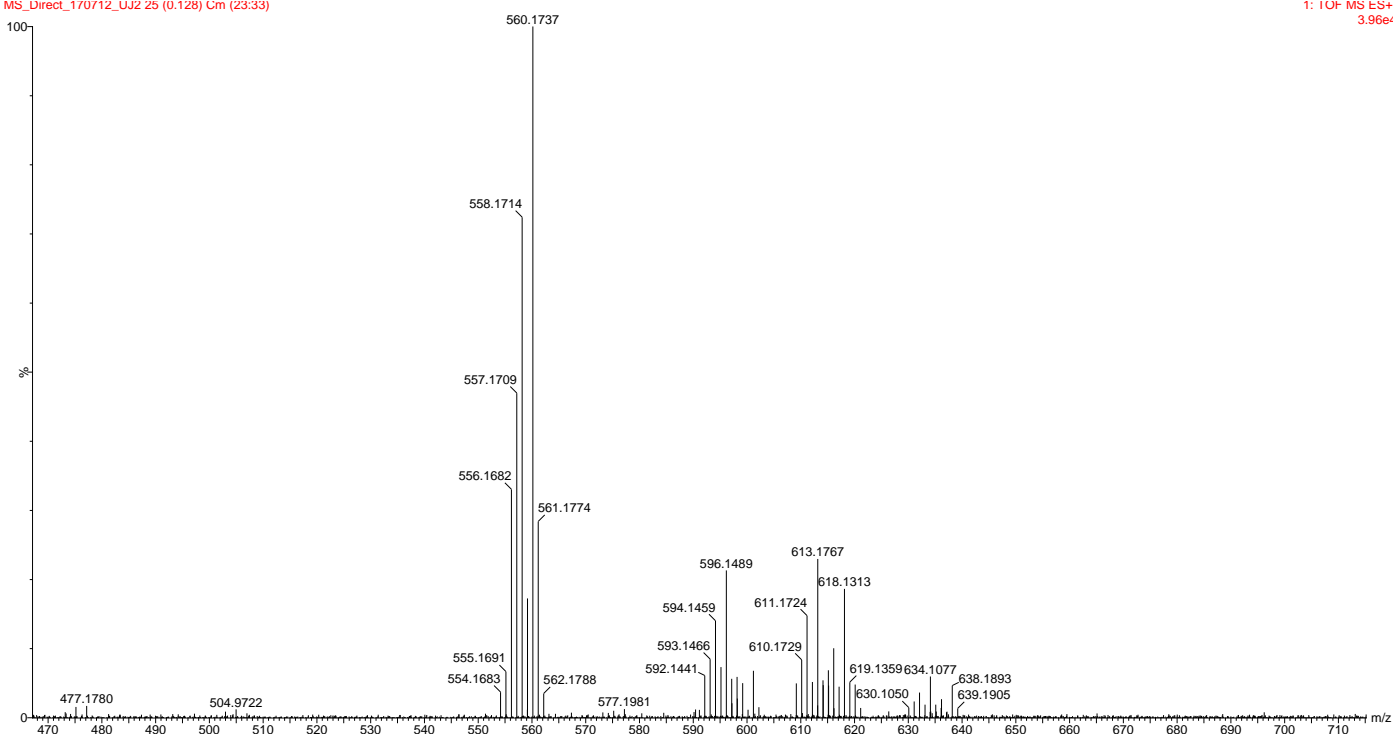

**Figure S35:** HRMS-ESI(+ve) spectrum for cyclometallated 1-benzyl-4-phenyl-1*H*-1,2,3-triazolyl(*p*-cymene)osmium(II) chloride complex **1d** showing a base peak at  $m/z$  560.1737 corresponding to  $C_{25}H_{28}N_3Os [M-Cl]^+$ , (calcd  $m/z$  560.1868).

## SUPPORTING INFORMATION

## REFERENCES

1. Zhang, Y.; Zhong, Q., Binding between bixin and whey protein at pH 7.4 studied by spectroscopy and isothermal titration calorimetry. *J. Agric. Food. Chem.* **2012**, *60* (7), 1880-1886.
